# Supplementary material for: Decompression alone or decompression and fusion in degenerative lumbar spondylolisthesis
Source: PubMed Central journal article supplement — eClinicalMedicine. 2022 Jul 16;51:101559. doi: 10.1016/j.eclinm.2022.101559 (PMC9294267; doi:10.1016/j.eclinm.2022.101559), 2022-07-16
Supplement: mmc1.pdf [file mmc1.pdf]

## Supplement files

### 1. Figures (eFigure 1- eFigure 31)

**eFigure 1.** Risk of bias summary of included RCTs.

**eFigure 2.** Risk of bias of included RCTs.

**eFigure 3.** Funnel plot of ODI.

**eFigure 4.** Subgroup analysis of ODI on the 3<sup>rd</sup> postoperative month.

**eFigure 5.** Subgroup analysis of ODI on the 12<sup>th</sup> post-operative month.

**eFigure 6.** Subgroup analysis of ODI on the 24<sup>th</sup> postoperative month.

**eFigure 7.** Sensitivity analysis of ODI between decompression and decompression with fusion groups (excluding Chan 2019a and Chan 2019b).

**eFigure 8.** Funnel plot of back pain scores.

**eFigure 9.** Subgroup analysis of back pain scores on 3<sup>rd</sup> post-operative month.

**eFigure 10.** Subgroup analysis of back pain scores on 24<sup>th</sup> postoperative month.

**eFigure 11.** Sensitivity analysis of back pain between decompression and decompression with fusion groups (excluding Chan 2019a and Chan 2019b).

**eFigure 12.** Funnel plot of leg pain scores.

**eFigure 13.** Subgroup analysis of leg pain scores on 3<sup>rd</sup> post-operative month.

**eFigure 14.** Subgroup analysis of leg pain scores on 12<sup>th</sup> post-operative month.

**eFigure 15.** Subgroup analysis of leg pain scores on 24<sup>th</sup> postoperative month.

**eFigure 16.** Sensitivity analysis of leg pain between decompression and decompression with fusion groups (excluding Chan 2019a and Chan 2019b).

**eFigure 17.** Funnel plot of clinical satisfaction.

**eFigure 18.** Sensitivity analysis of clinical satisfaction between decompression and decompression with fusion groups (excluding Bridwell 1993; Yone 1996).

**eFigure 19.** Funnel plot of complication rates.

**eFigure 20.** Subgroup analysis of complication rates.

**eFigure 21.** Sensitivity analysis of complication rates between decompression and decompression with fusion groups (excluding Bridwell 1993; Yone 1996).

**eFigure 22.** Funnel plot of reoperation rates.

**eFigure 23.** Subgroup analysis of reoperation rates for short-term follow-up.

**eFigure 24.** Subgroup analysis of reoperation rates for long-term follow-up.

**eFigure 25.** Sensitivity analysis of reoperation rates between decompression and decompression with fusion groups (excluding Bridwell 1993).

**eFigure 26.** The forest plot regarding operation time compared decompression with decompression with fusion group.

**eFigure 27.** Subgroup analysis of operation time.

**eFigure 28.** The forest plot regarding intra-operative blood loss compared decompression with decompression with fusion group.

**eFigure 29.** Subgroup analysis of intra-operative blood loss.

**eFigure 30.** The forest plot regarding length of hospital stay compared decompression with decompression with fusion group.

**eFigure 31.** Subgroup analysis of length of hospital stay.

## **2. Tables (eTable 1- eTable 5)**

**eTable 1.** Search strategy.

**eTable 2.** Inclusion/exclusion criteria of literature.

**eTable 3.** Risk of bias table.

**eTable 4.** Characteristics of the Included Trials and Participants.

**eTable 5.** Scores of the Newcastle-Ottawa Quality Assessment Scale for 27 cohort studies.

**eFigure 1. Risk of bias summary of included RCTs.**

|                | Random sequence generation (selection bias) | Allocation concealment (selection bias) | Blinding of participants and personnel (performance bias) | Blinding of outcome assessment (detection bias) | Incomplete outcome data (attrition bias) | Selective reporting (reporting bias) | Other bias |
|----------------|---------------------------------------------|-----------------------------------------|-----------------------------------------------------------|-------------------------------------------------|------------------------------------------|--------------------------------------|------------|
| Austevoll 2021 | +                                           | +                                       | -                                                         | +                                               | +                                        | +                                    | +          |
| Bridwell 1993  | -                                           | -                                       | -                                                         | ?                                               | +                                        | +                                    | +          |
| Forsth 2016    | +                                           | -                                       | -                                                         | +                                               | +                                        | +                                    | ?          |
| Ghogawala 2016 | ?                                           | ?                                       | -                                                         | +                                               | -                                        | +                                    | +          |
| Herkowitz 1991 | -                                           | -                                       | -                                                         | ?                                               | +                                        | +                                    | ?          |
| Inose 2022     | +                                           | -                                       | -                                                         | ?                                               | +                                        | +                                    | ?          |

**eFigure 2. Risk of bias of included RCTs.**

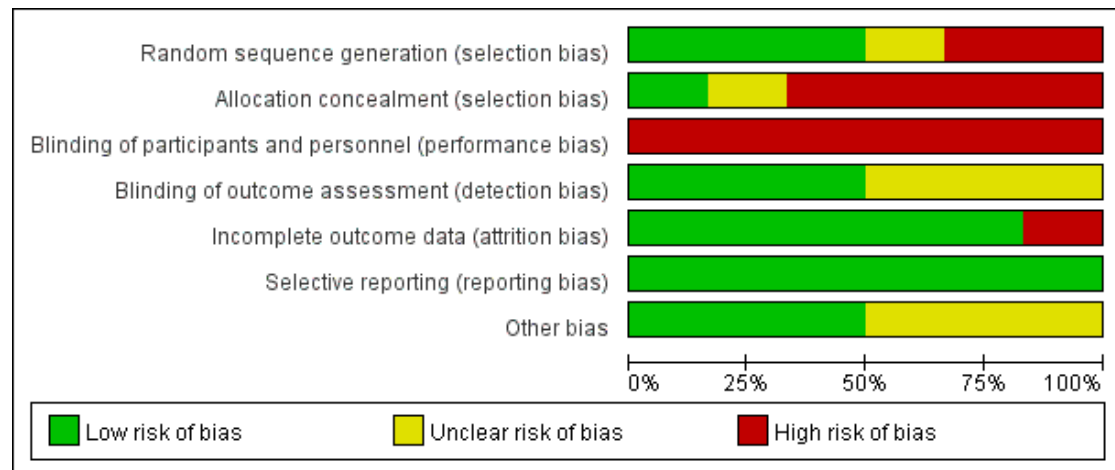

**eFigure 3. Funnel plot of ODI.**

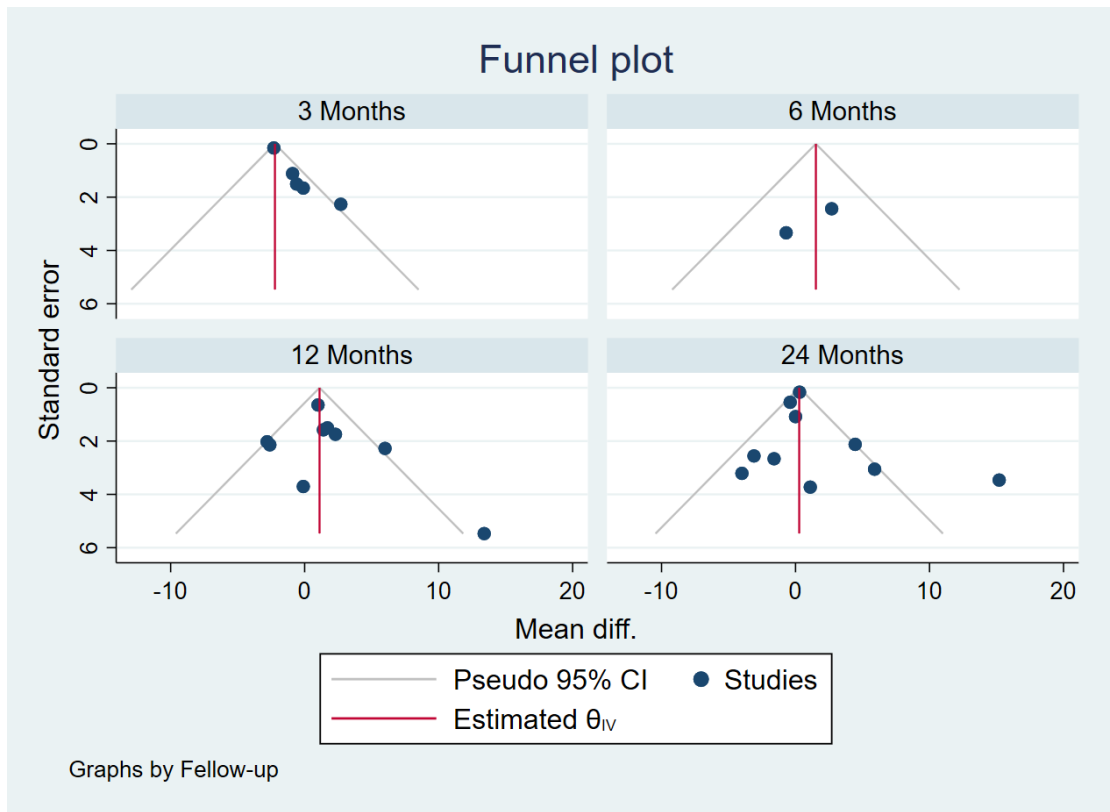

**eFigure 4. Subgroup analysis of ODI on the 3<sup>rd</sup> post-operative month.**

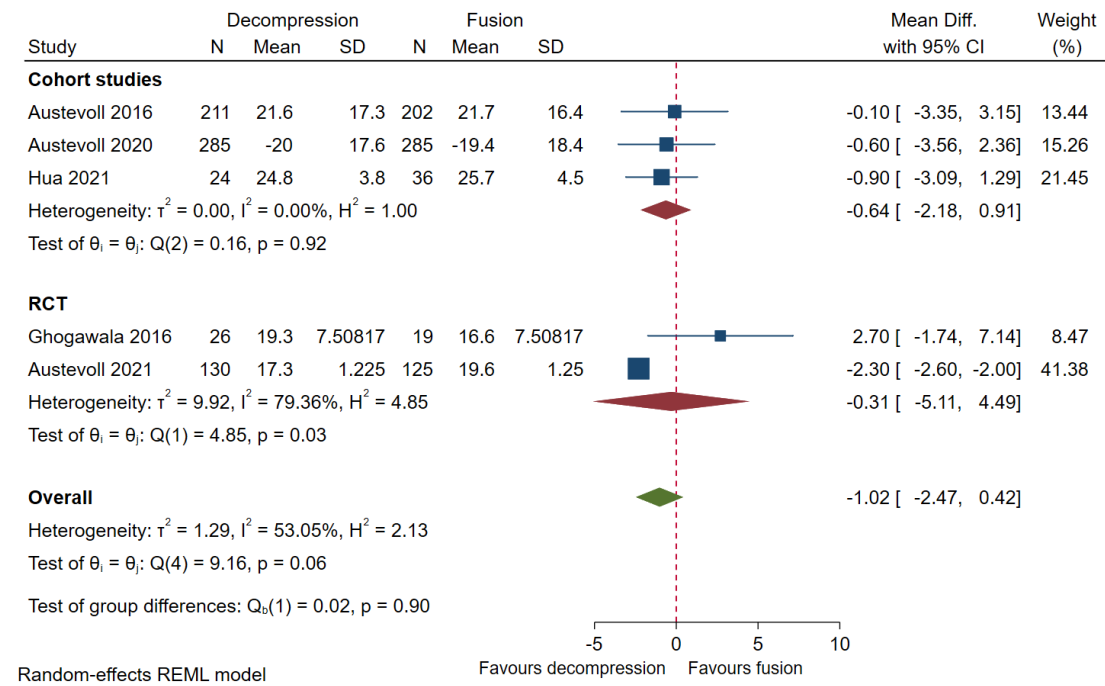

**eFigure 5. Subgroup analysis of ODI on the 12<sup>th</sup> post-operative month.**

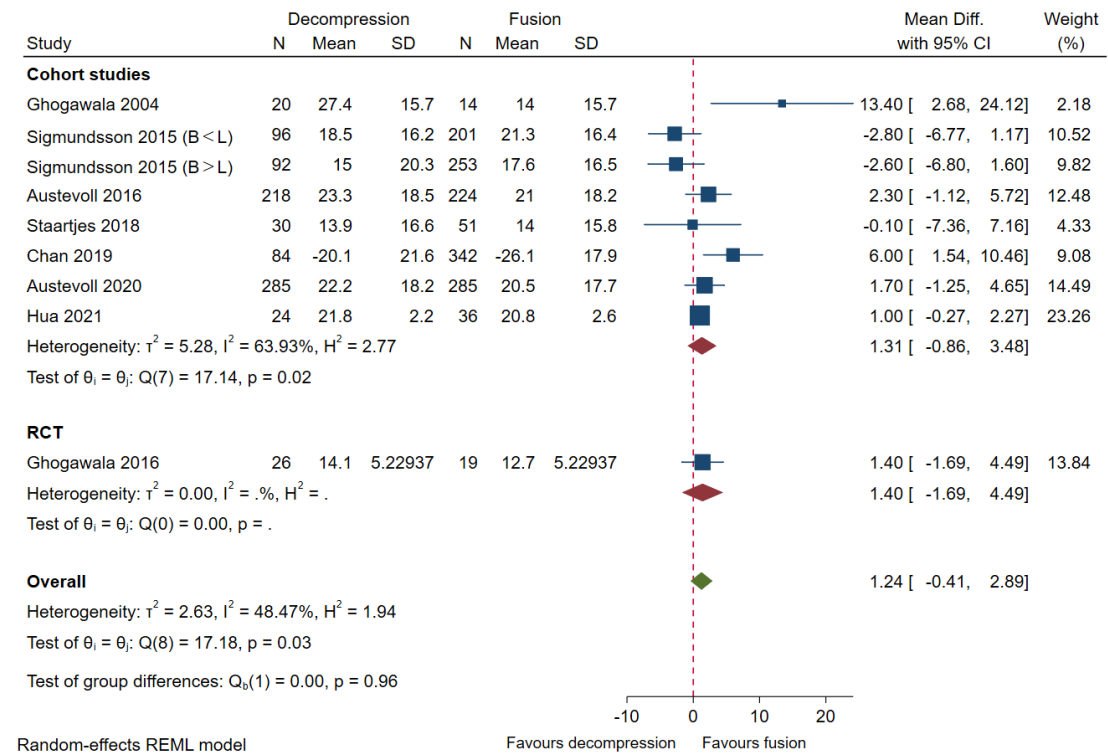

**eFigure 6. Subgroup analysis of ODI on the 24<sup>th</sup> post-operative month.**

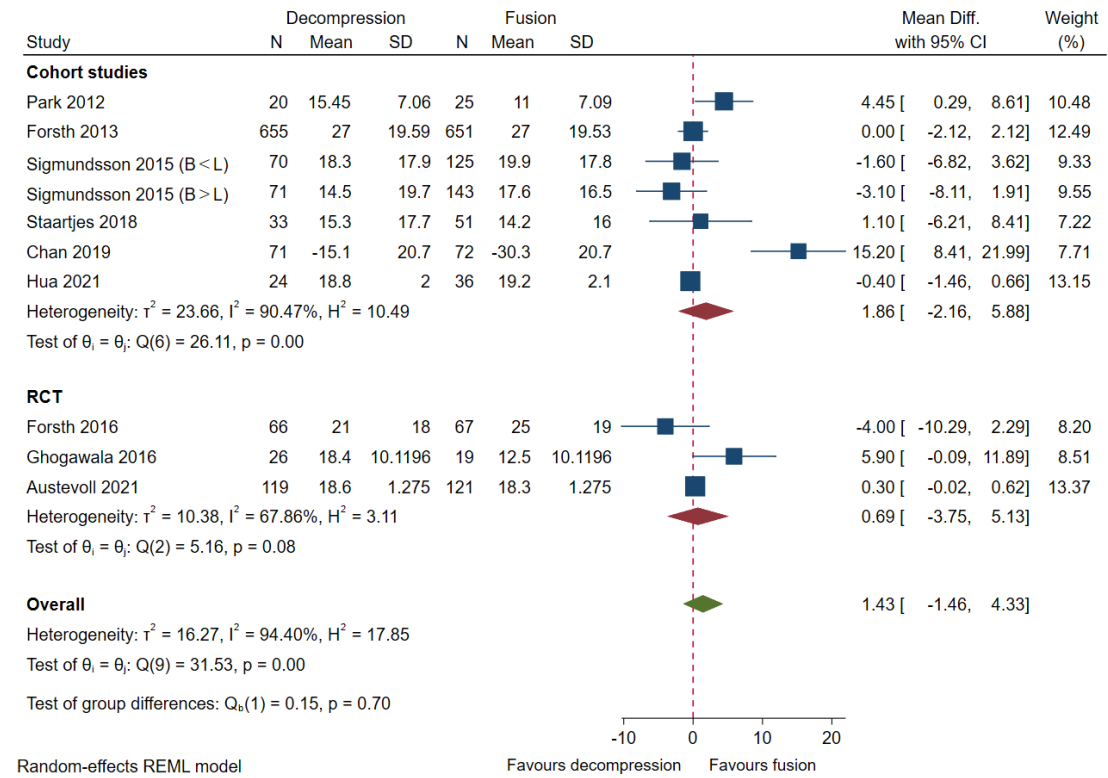



**eFigure 7. Sensitivity analysis of ODI between decompression and decompression with fusion groups (excluding Chan 2019a and Chan 2019b).**

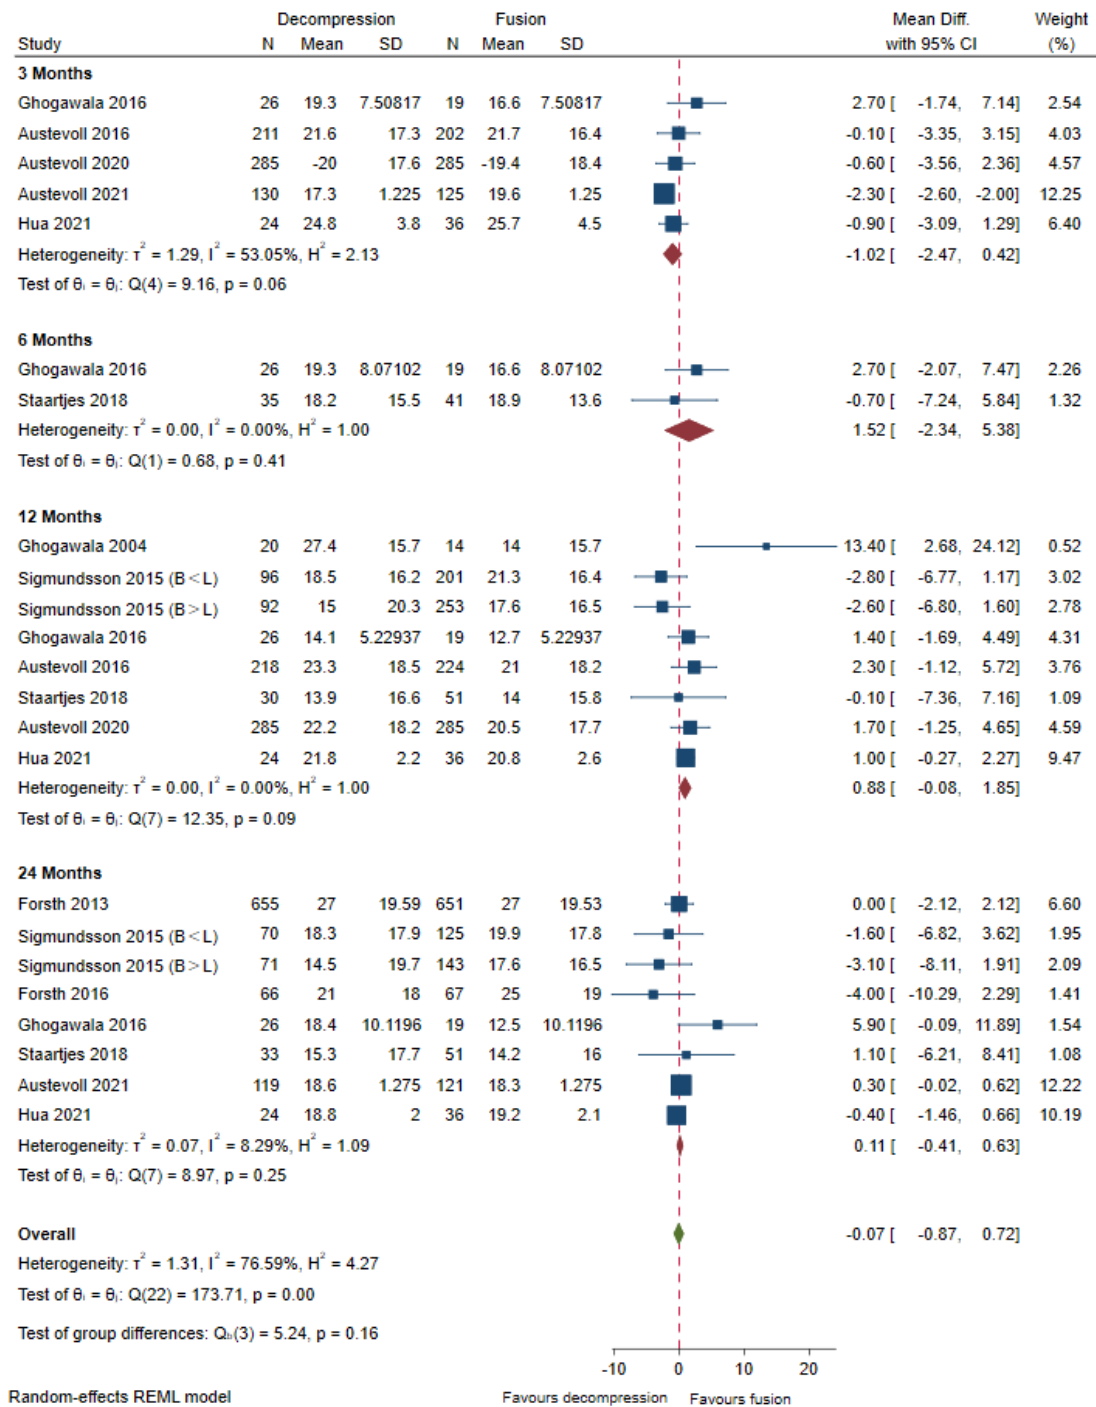

**eFigure 8. Funnel plot of back pain scores.**

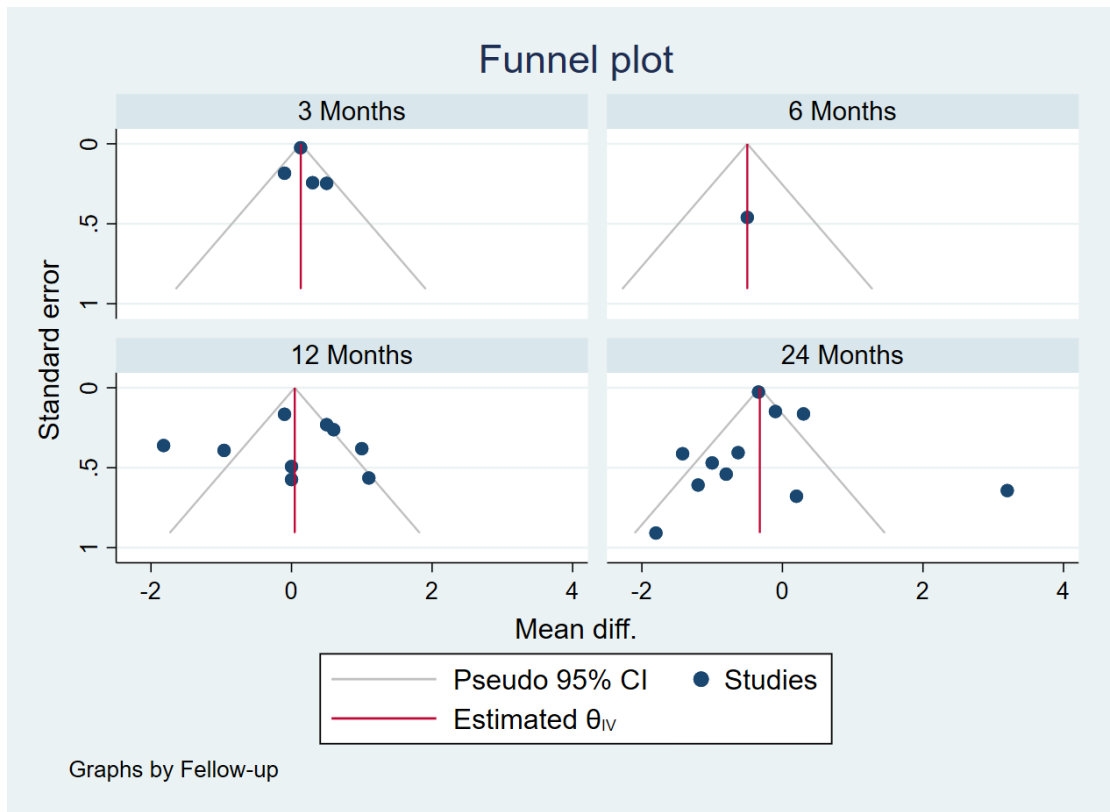

**eFigure 9. Subgroup analysis of back pain scores on 3<sup>rd</sup> post-operative month.**

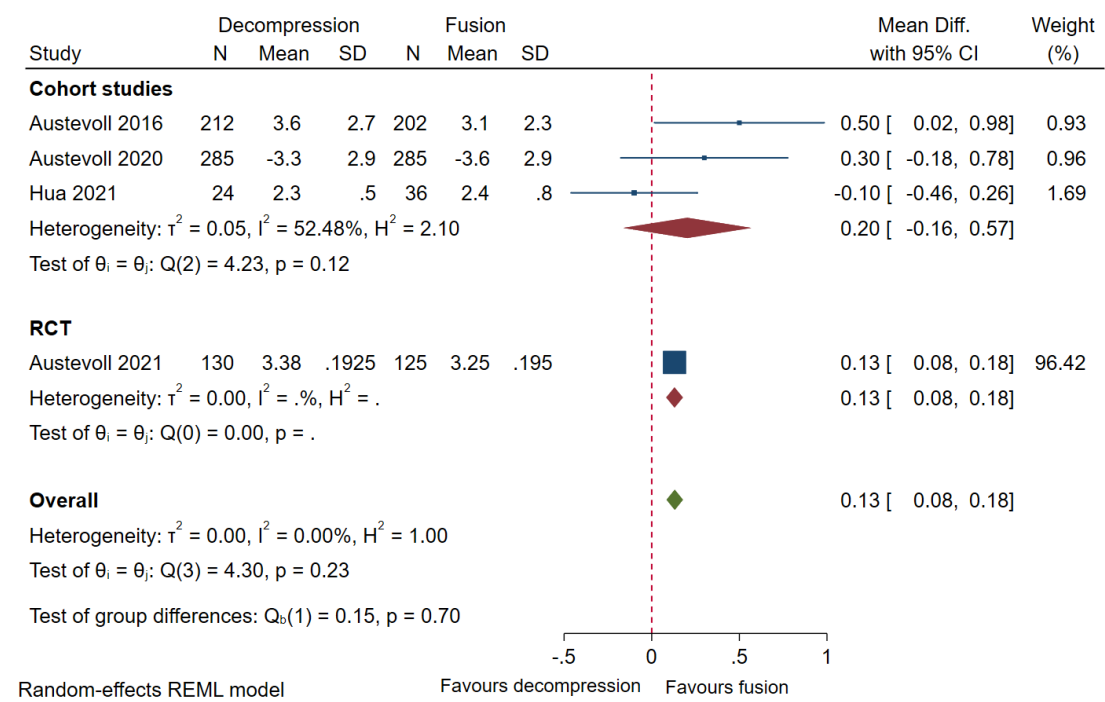

**Figure 10. Subgroup analysis of back pain scores on 24<sup>th</sup> post-operative month.**

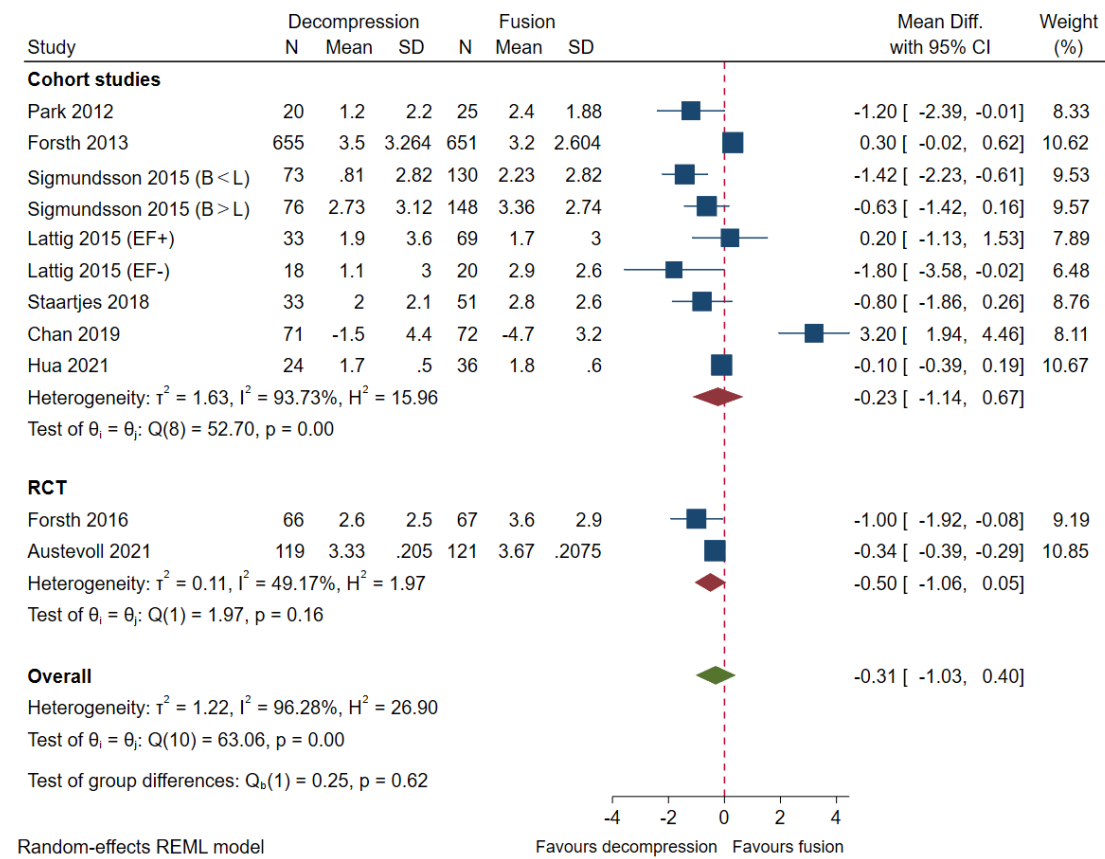

Random-effects REML model

**eFigure 11. Sensitivity analysis of back pain between decompression and decompression with fusion groups (excluding Chan 2019a and Chan 2019b).**

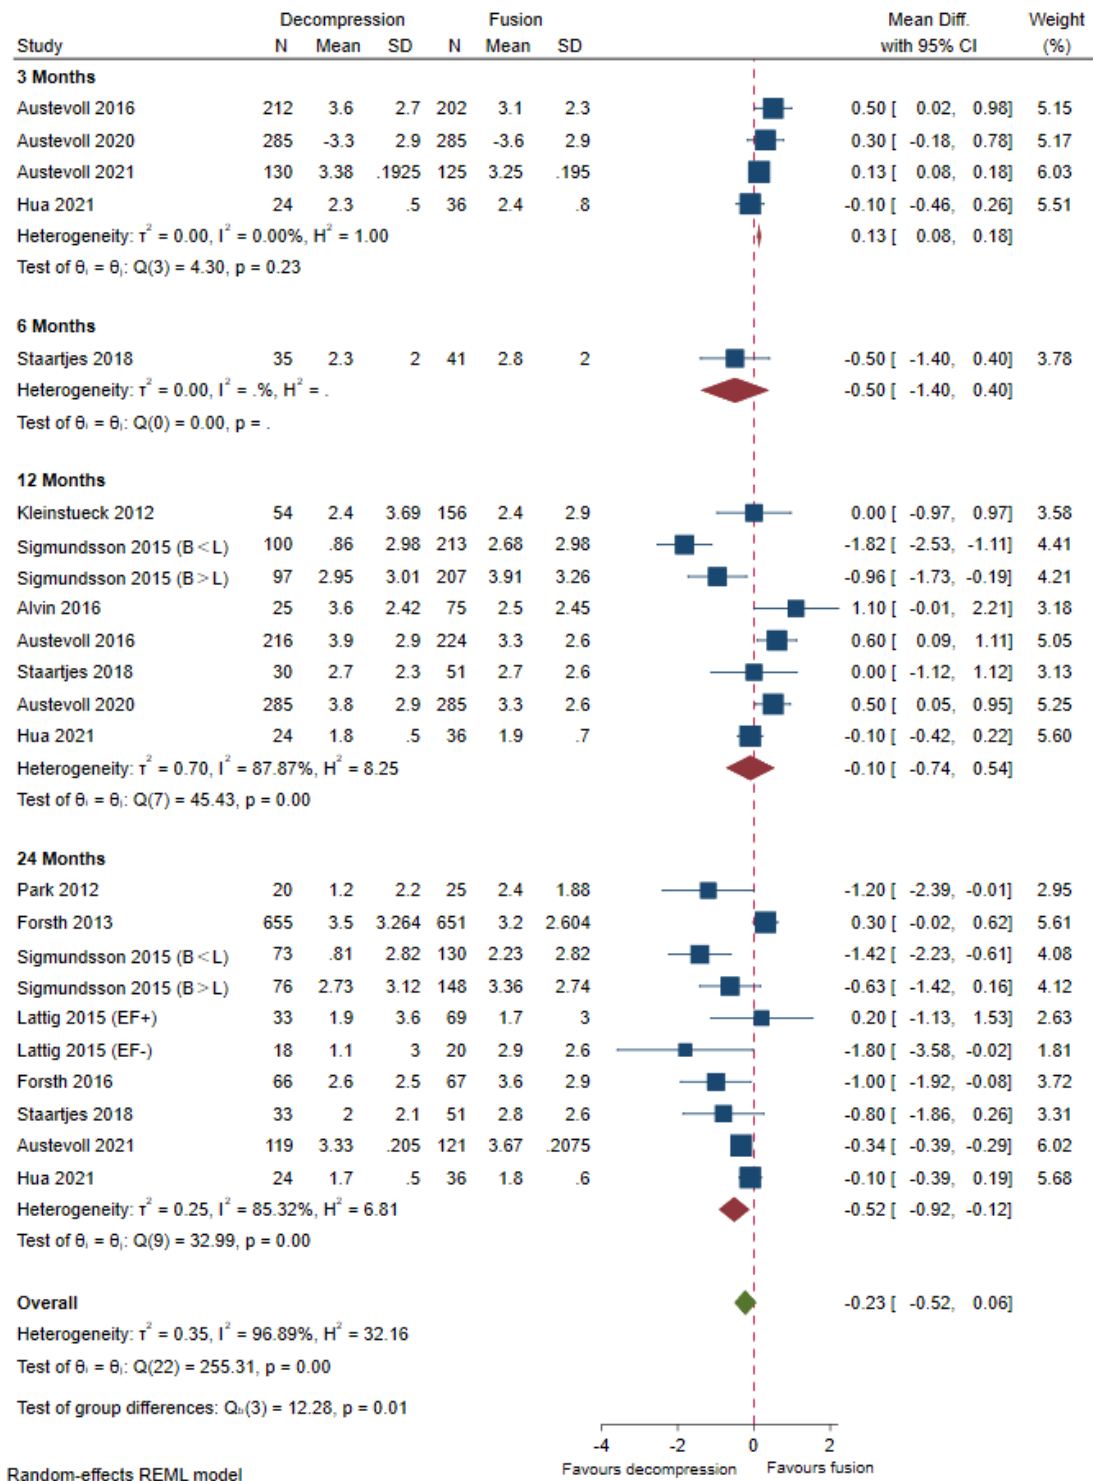

**eFigure 12. Funnel plot of leg pain scores.**

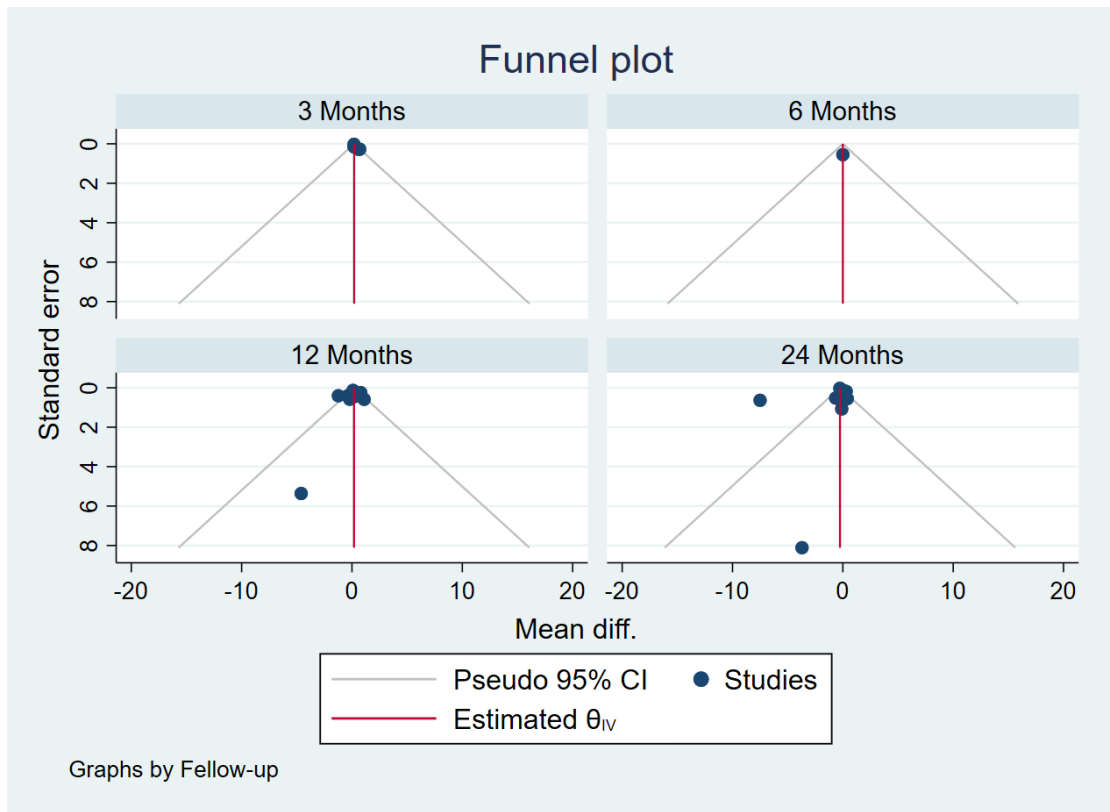

**eFigure 13. Subgroup analysis of leg pain scores on 3<sup>rd</sup> post-operative month.**

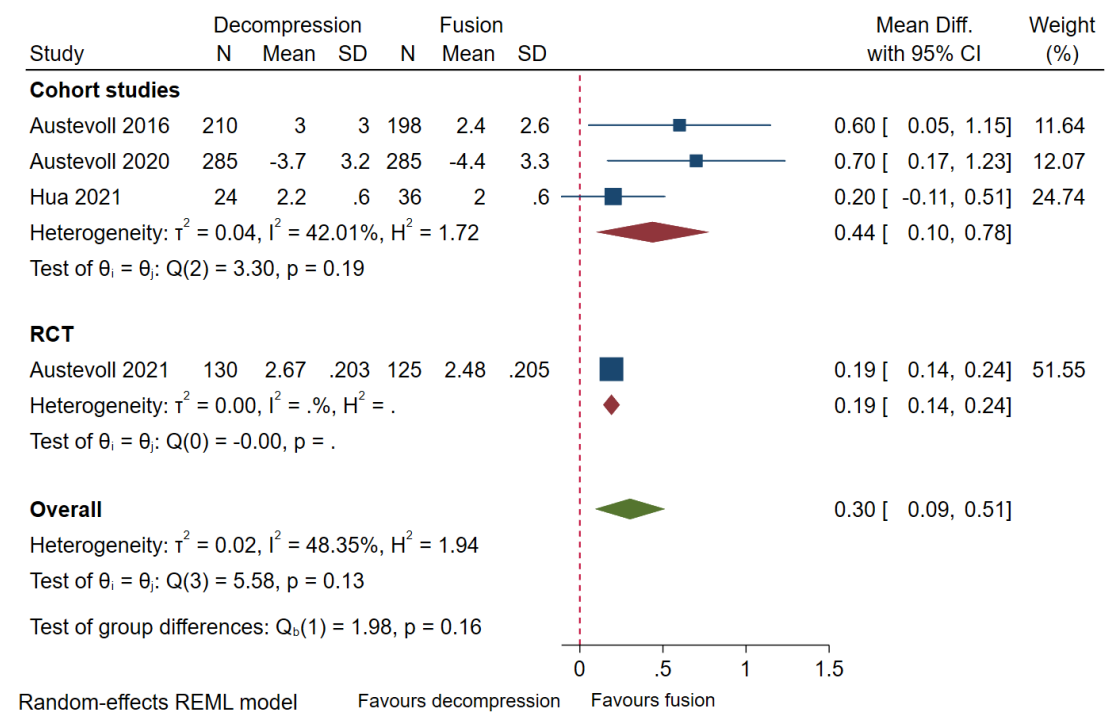

**eFigure 14. Subgroup analysis of leg pain scores on 12<sup>th</sup> post-operative month.**

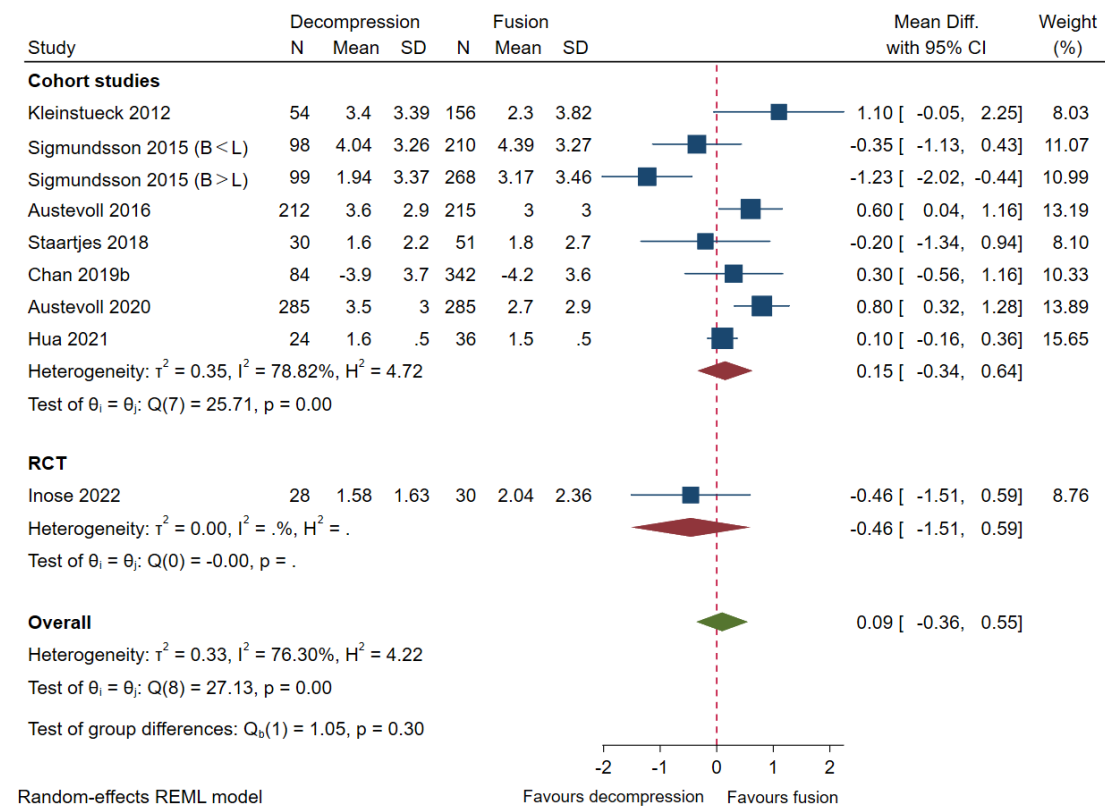



**eFigure 15. Subgroup analysis of leg pain scores on 24<sup>th</sup> post-operative month.**

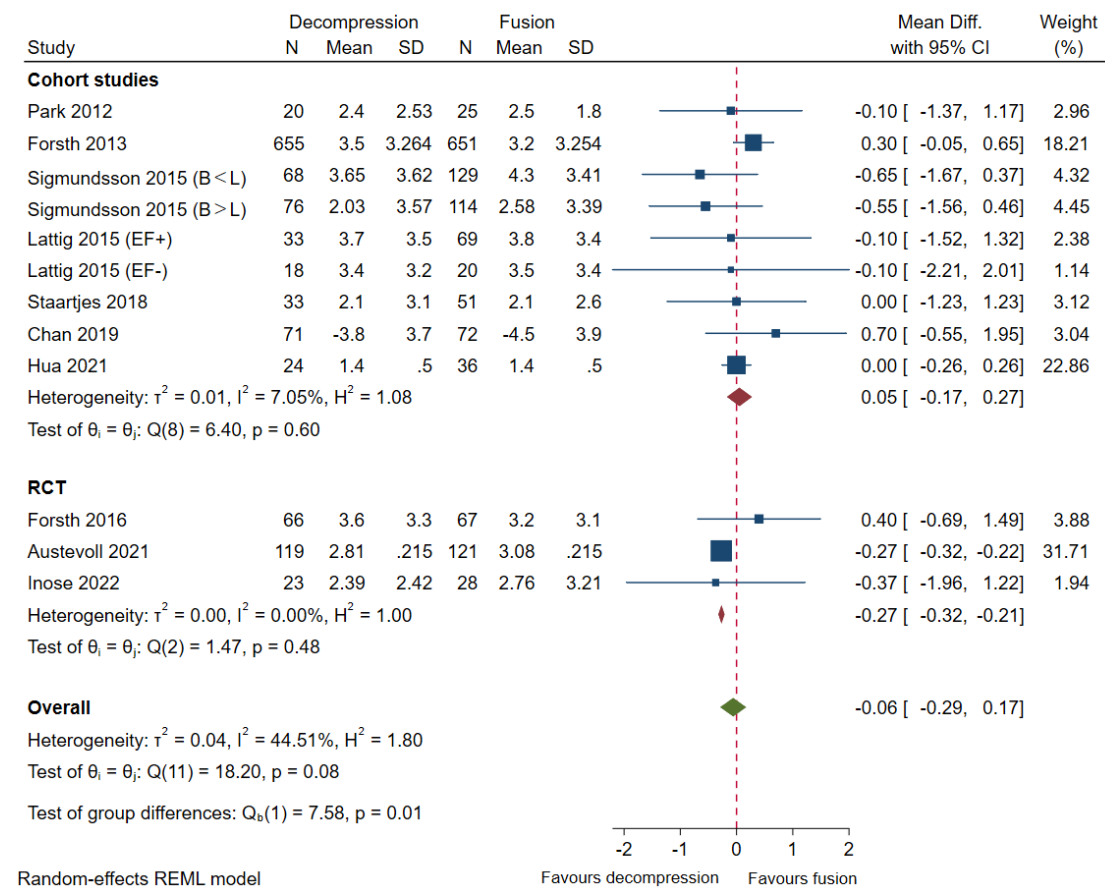

**eFigure 16.** Sensitivity analysis of leg pain between decompression and decompression with fusion groups (excluding Chan 2019a and Chan 2019b).

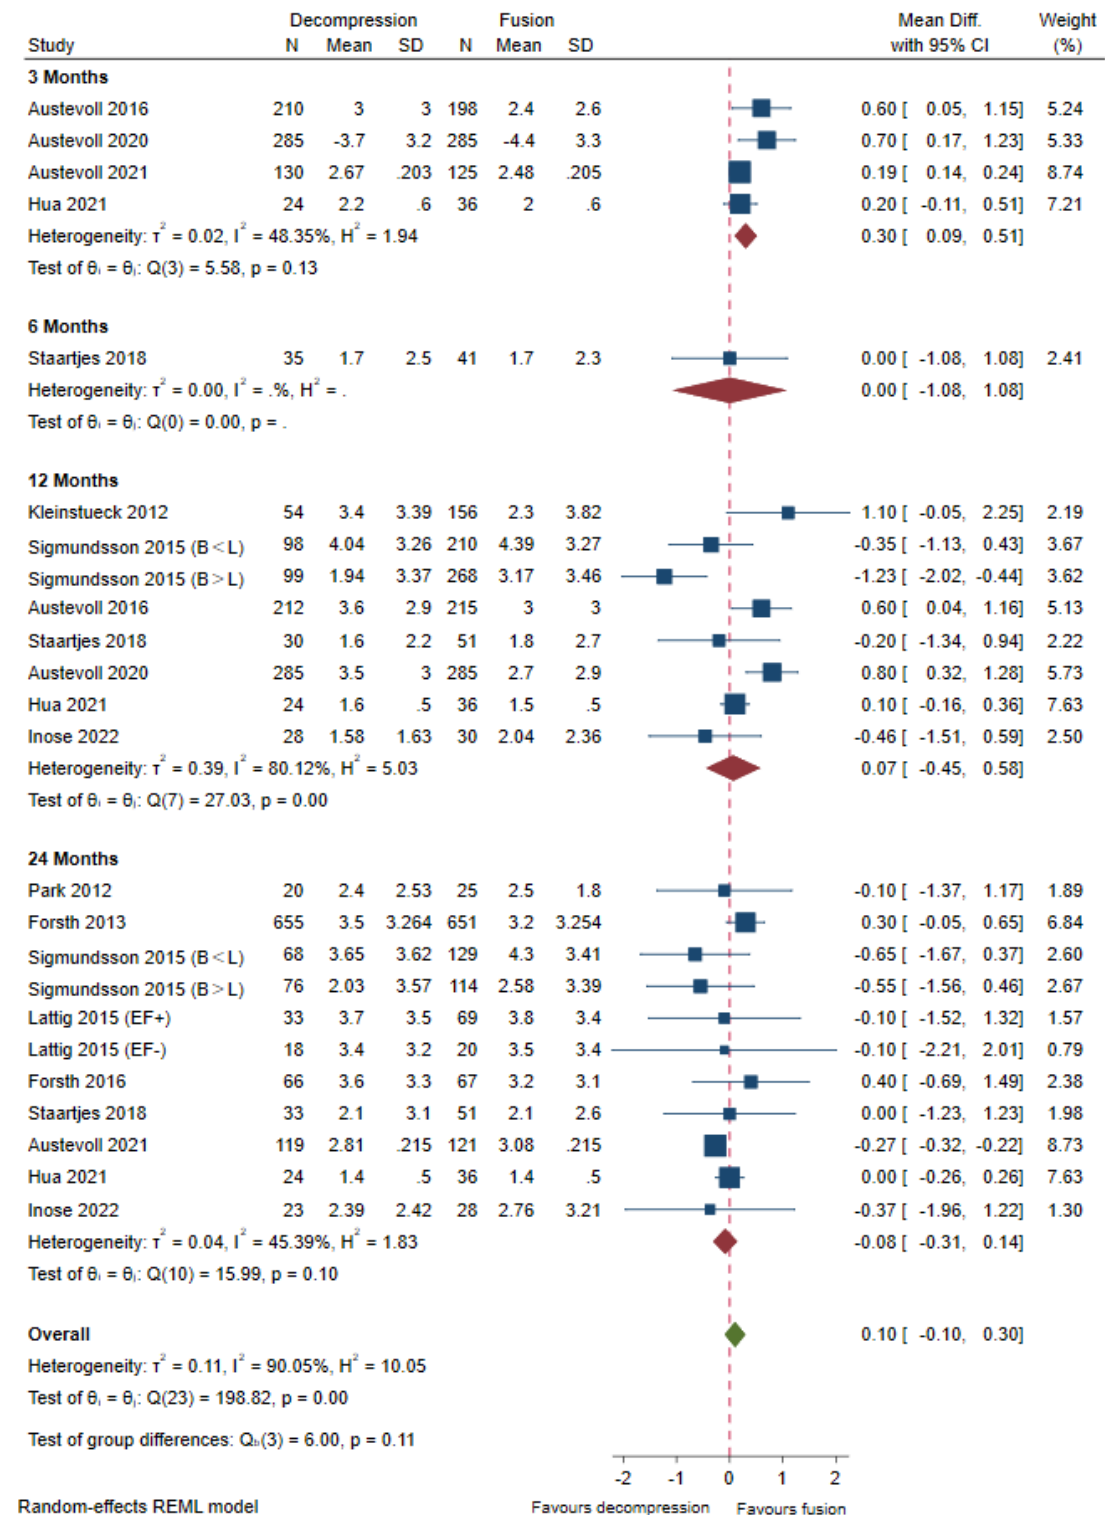

**eFigure 17. Funnel plot of clinical satisfaction.**

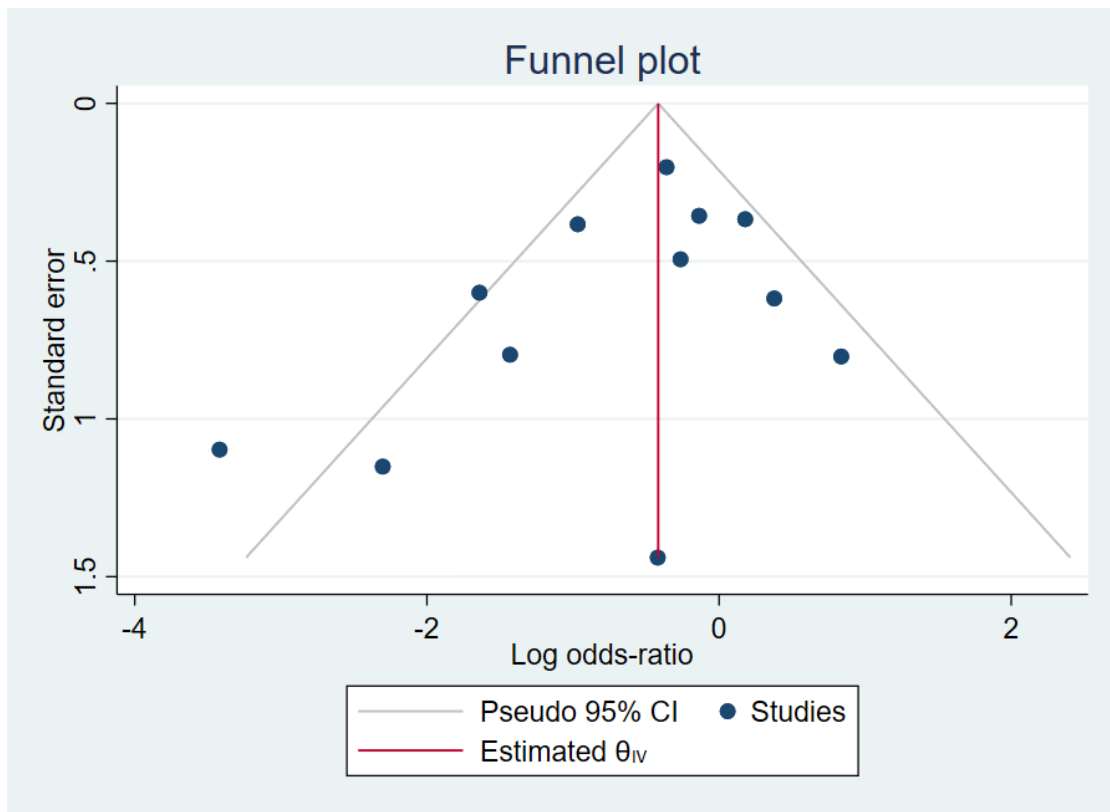

**eFigure 18. Sensitivity analysis of clinical satisfaction between decompression and decompression with fusion groups (excluding Bridwell 1993; Yone 1996).**

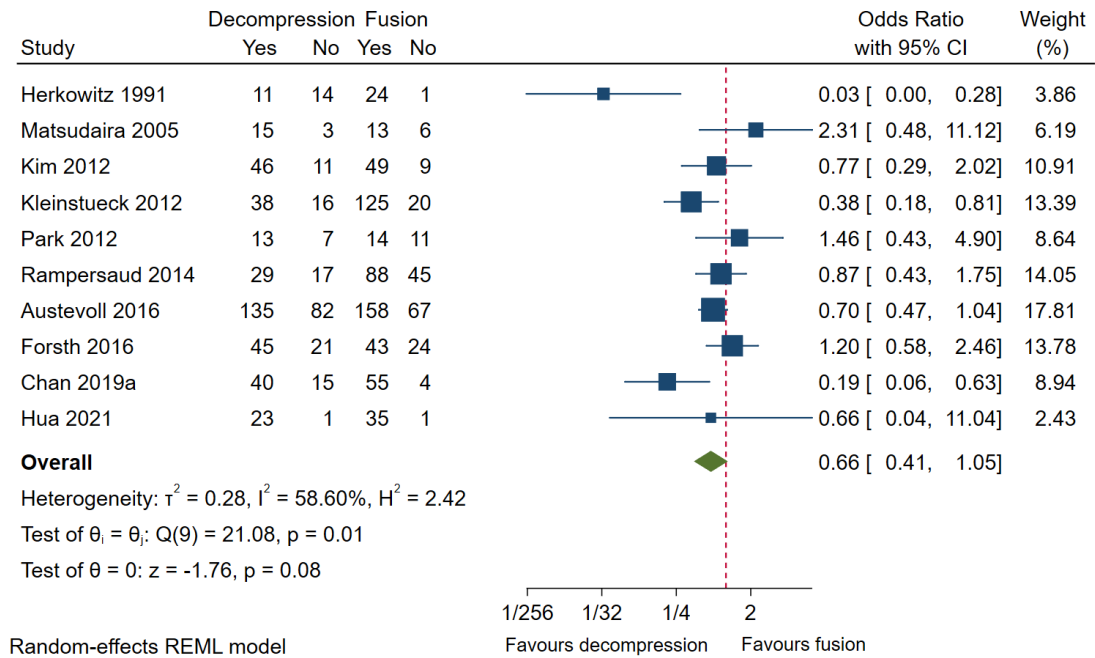

**eFigure 19. Funnel plot of complication rates.**

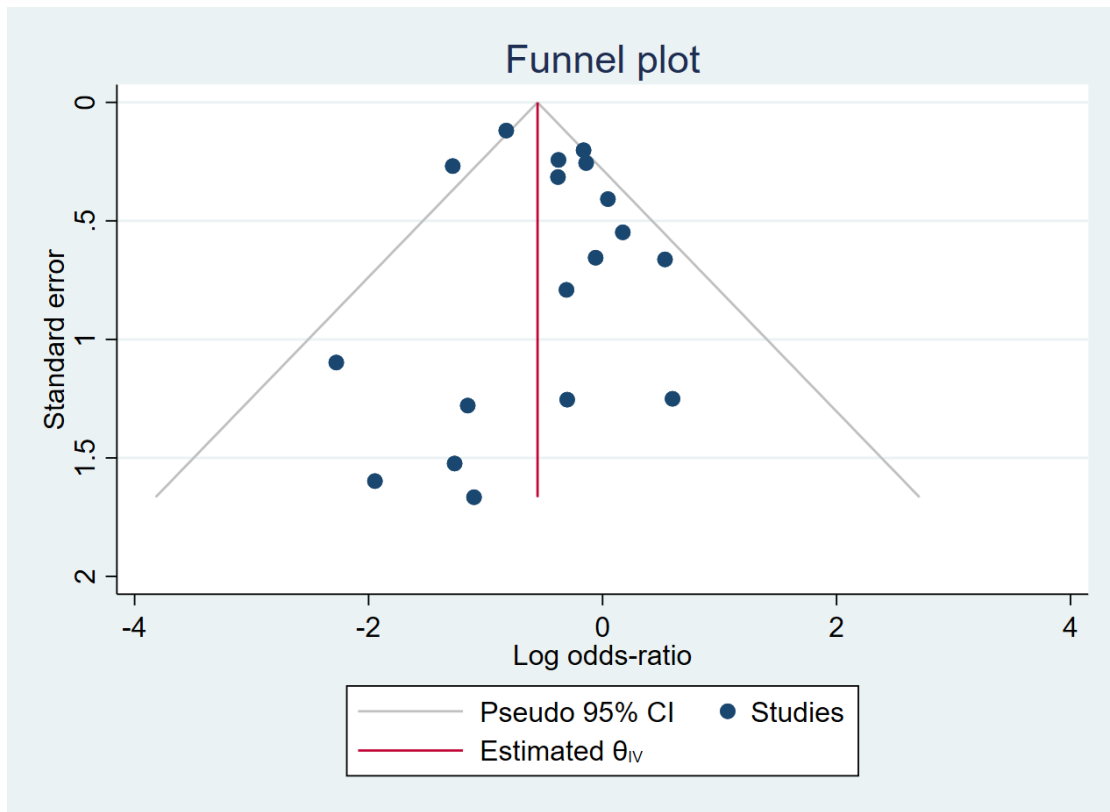

**eFigure 20. Subgroup analysis of complication rates.**

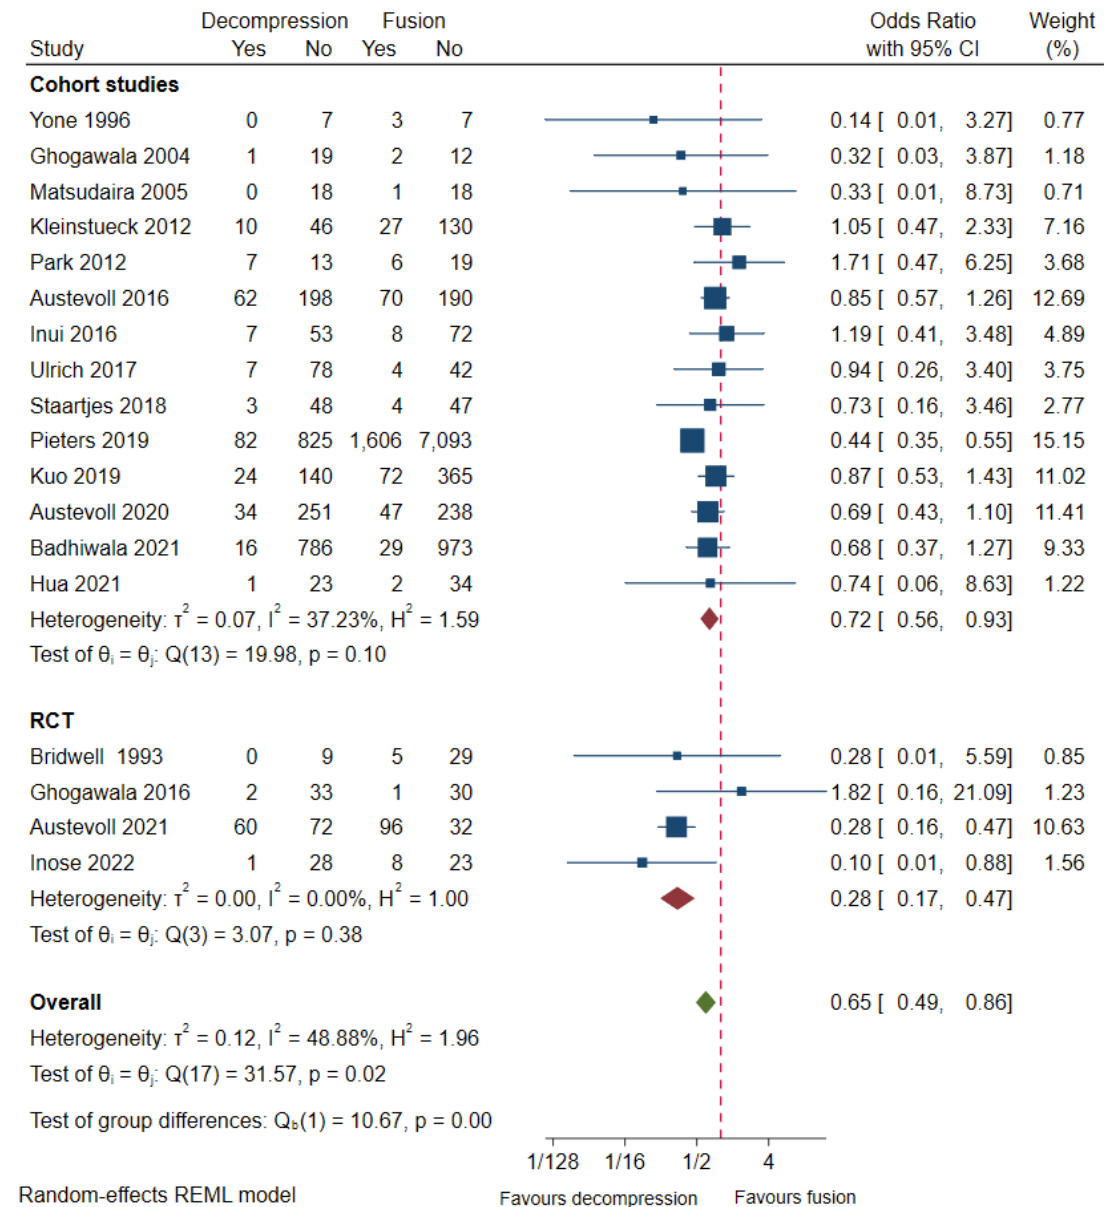

**eFigure 21. Sensitivity analysis of complication rates between decompression and decompression with fusion groups (excluding Bridwell 1993; Yone 1996).**

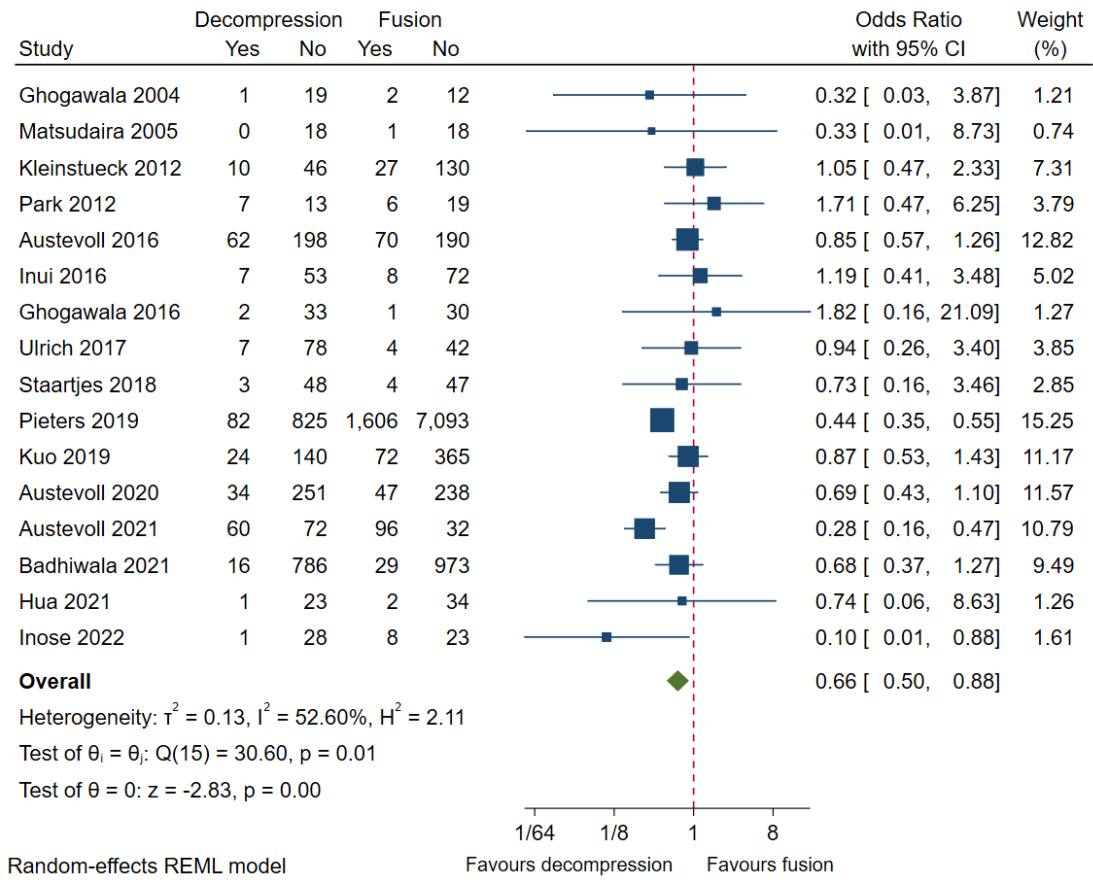

**eFigure 22. Funnel plot of reoperation rates.**

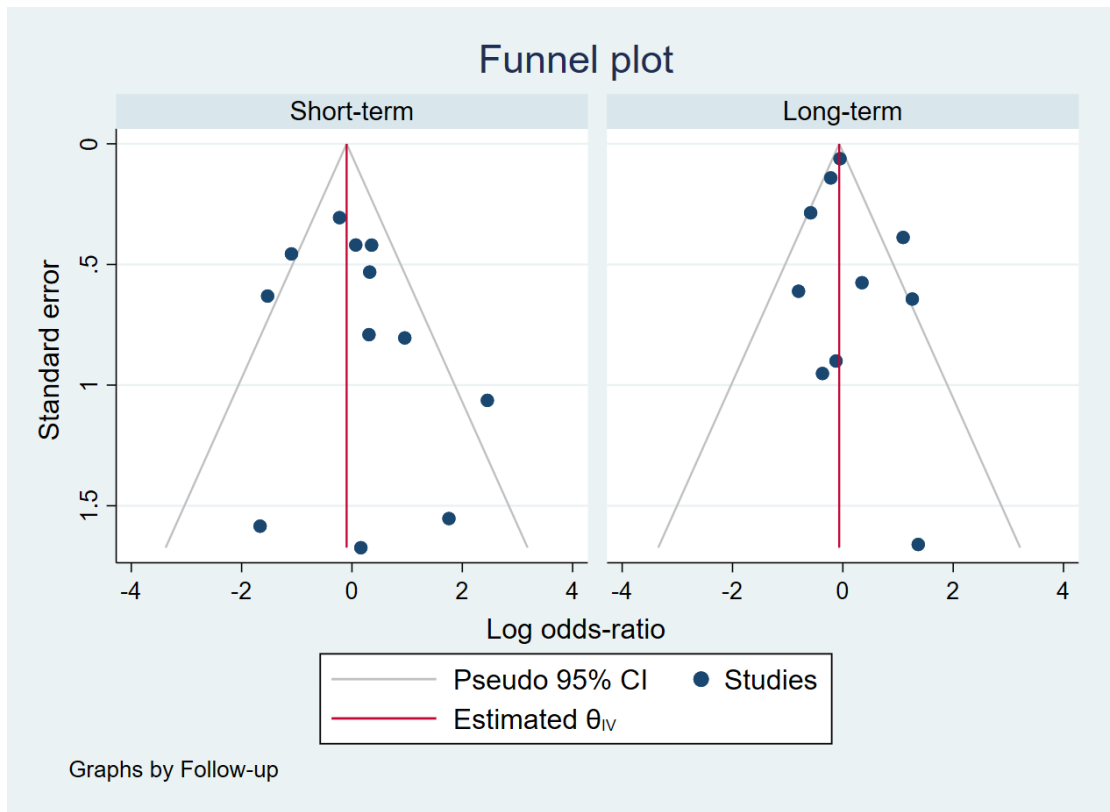



**eFigure 23. Subgroup analysis of reoperation rates for short-term follow-up.**

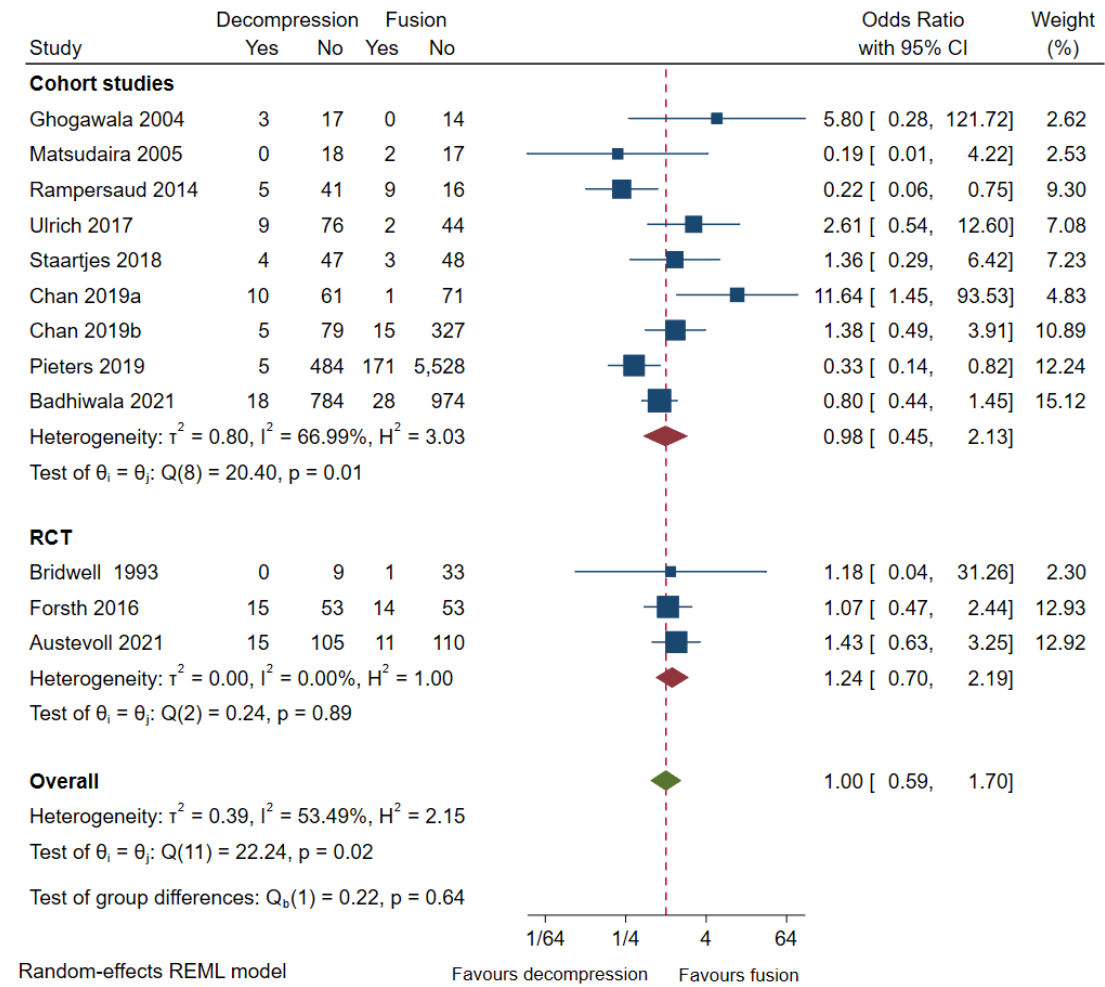

**eFigure 24. Subgroup analysis of reoperation rates for long-term follow-up.**

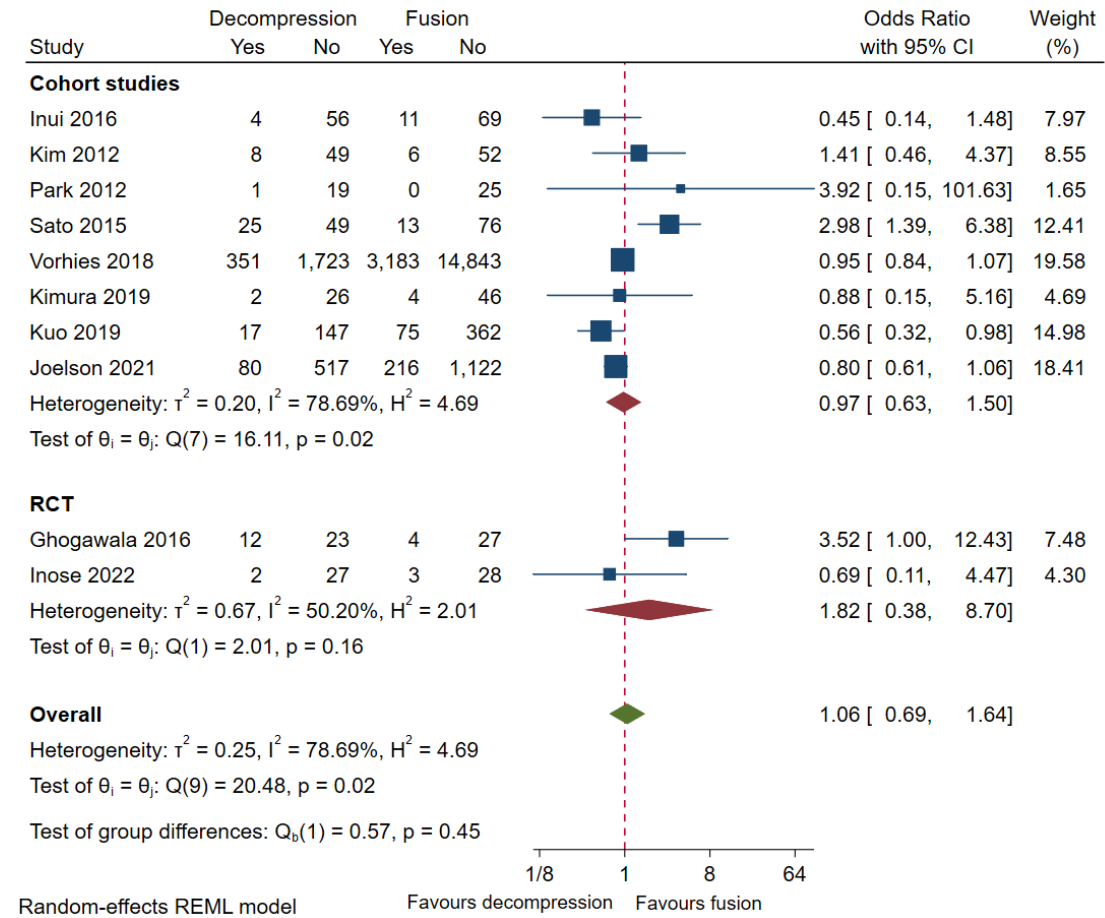

**Figure 25. Sensitivity analysis of reoperation rates between decompression and decompression with fusion groups (excluding Bridwell 1993).**

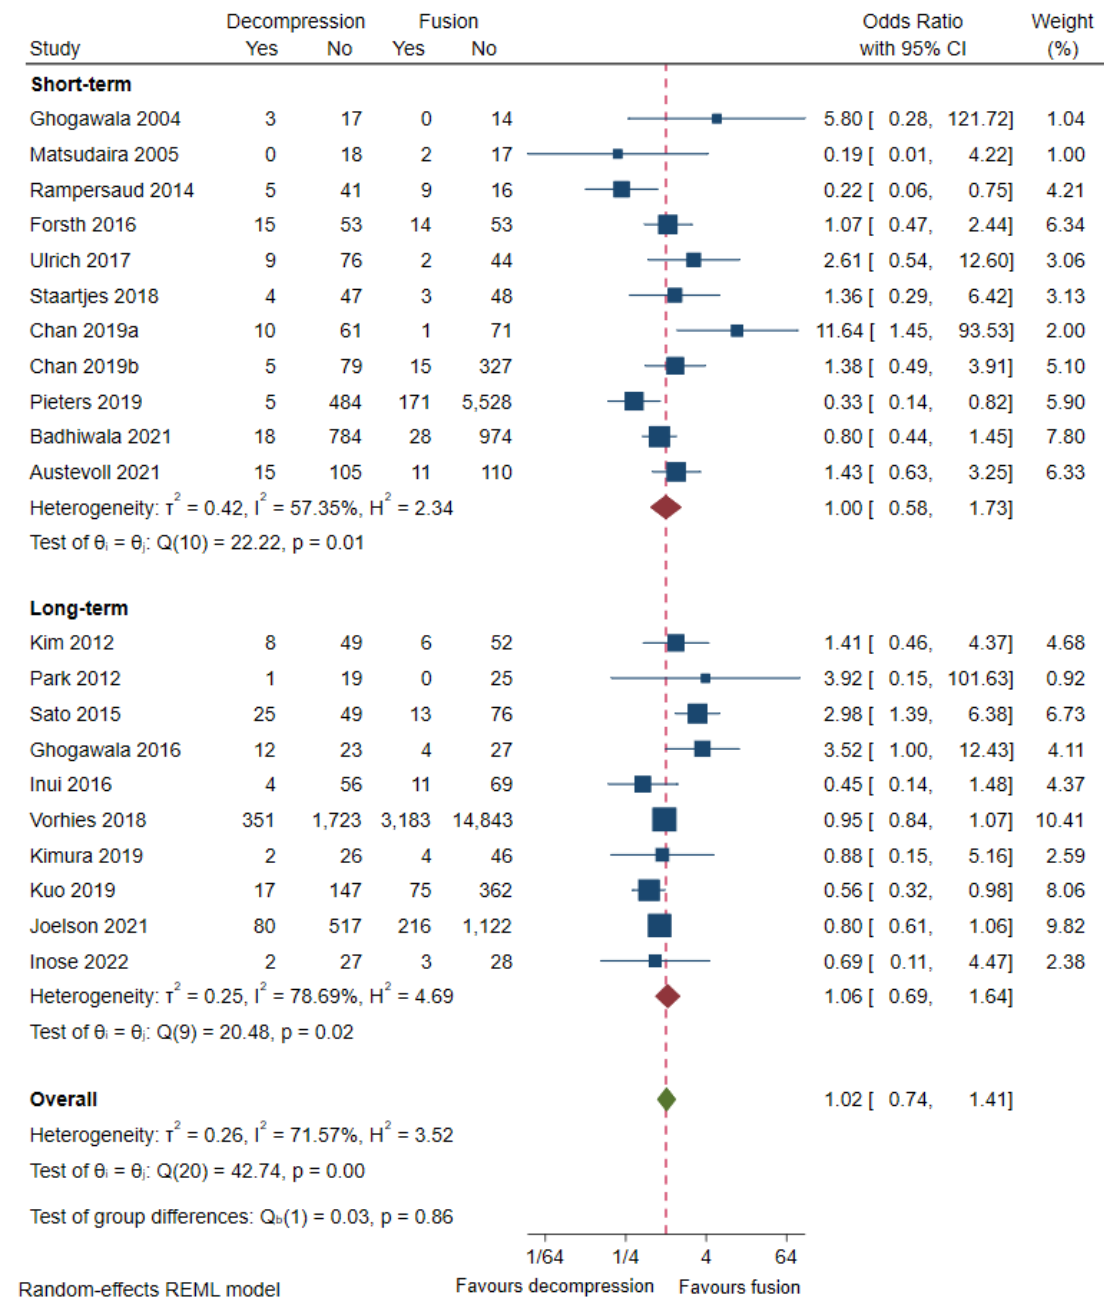

**eFigure 26. The forest plot regarding operation time compared decompression with decompression with fusion group.**

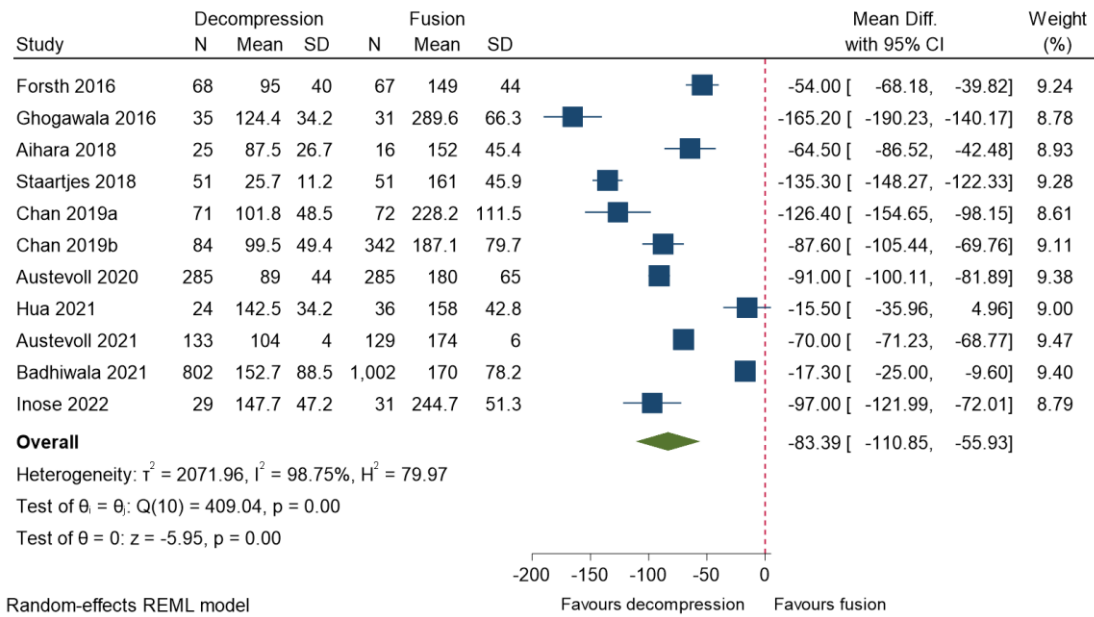

**Figure 27. Subgroup analysis of operation time.**

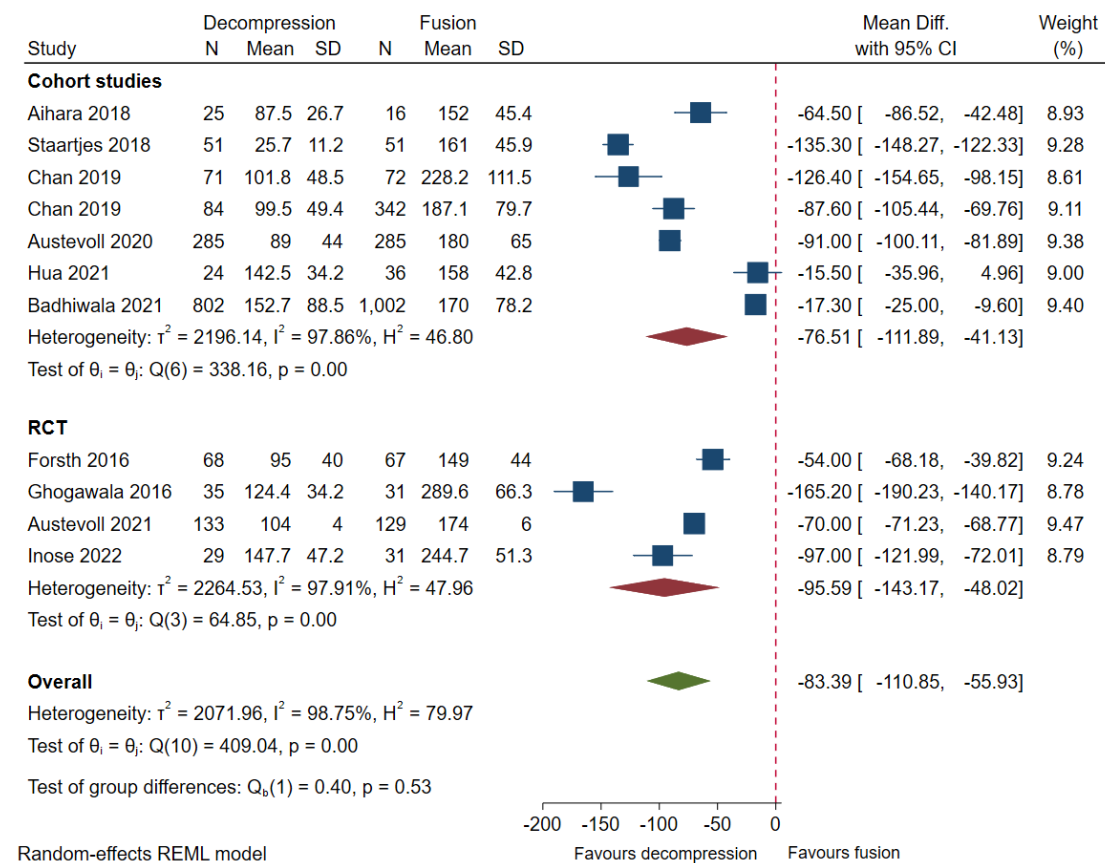

**eFigure 28. The forest plot regarding intra-operative blood loss compared decompression with decompression with fusion group.**

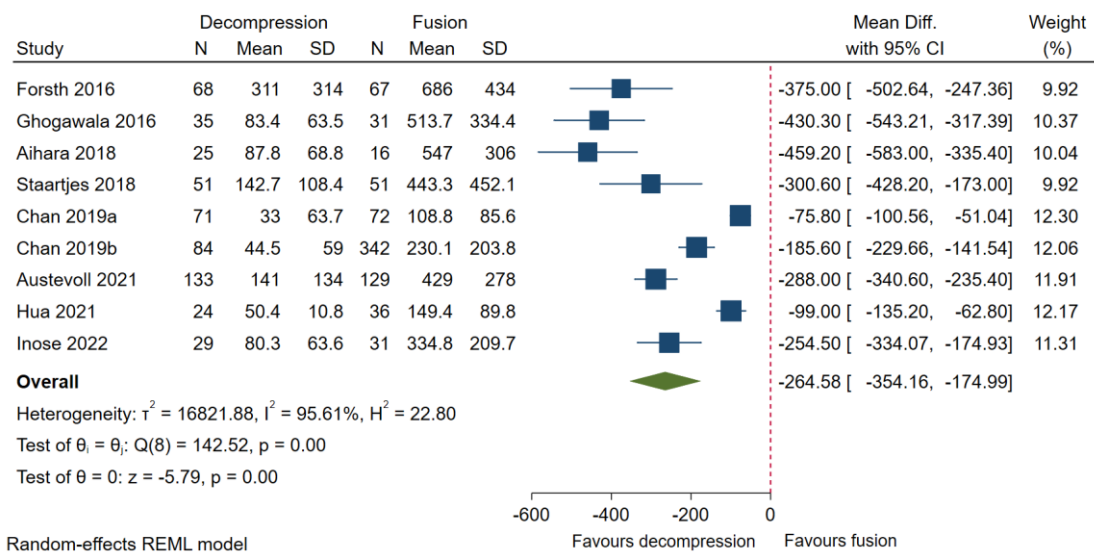

**eFigure 29. Subgroup analysis of intra-operative blood loss.**

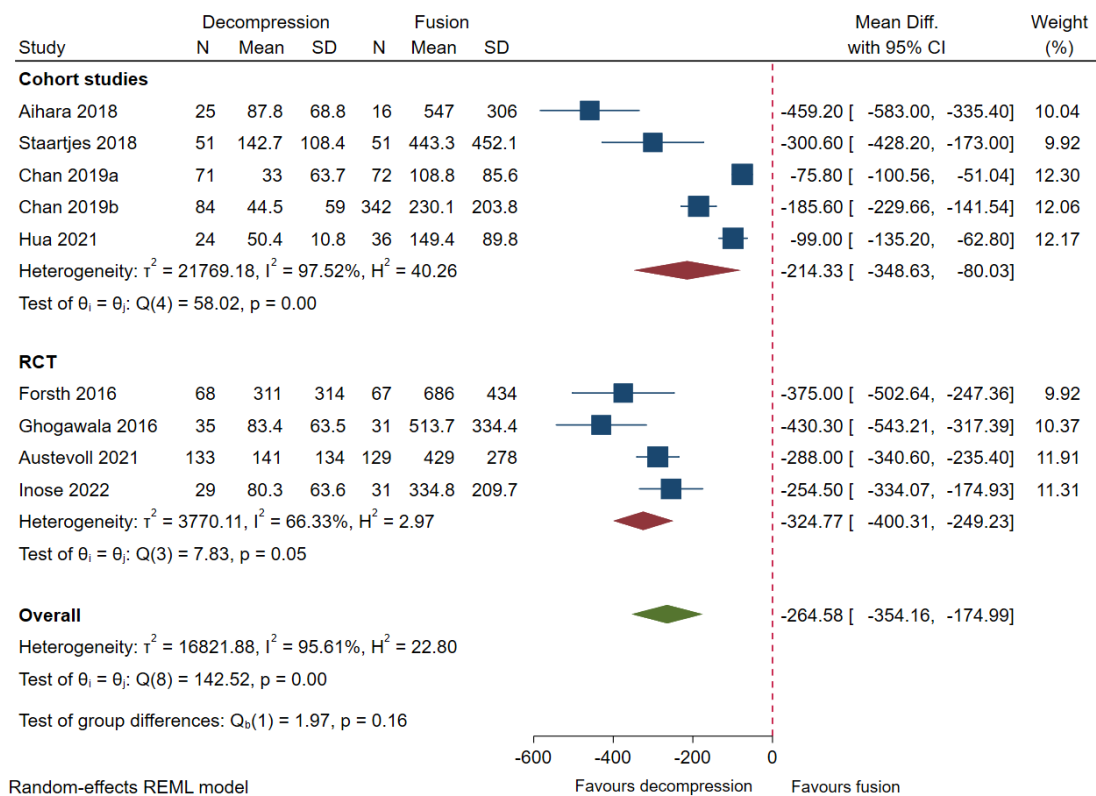

**eFigure 30. The forest plot regarding length of hospital stay compared decompression with decompression with fusion group.**

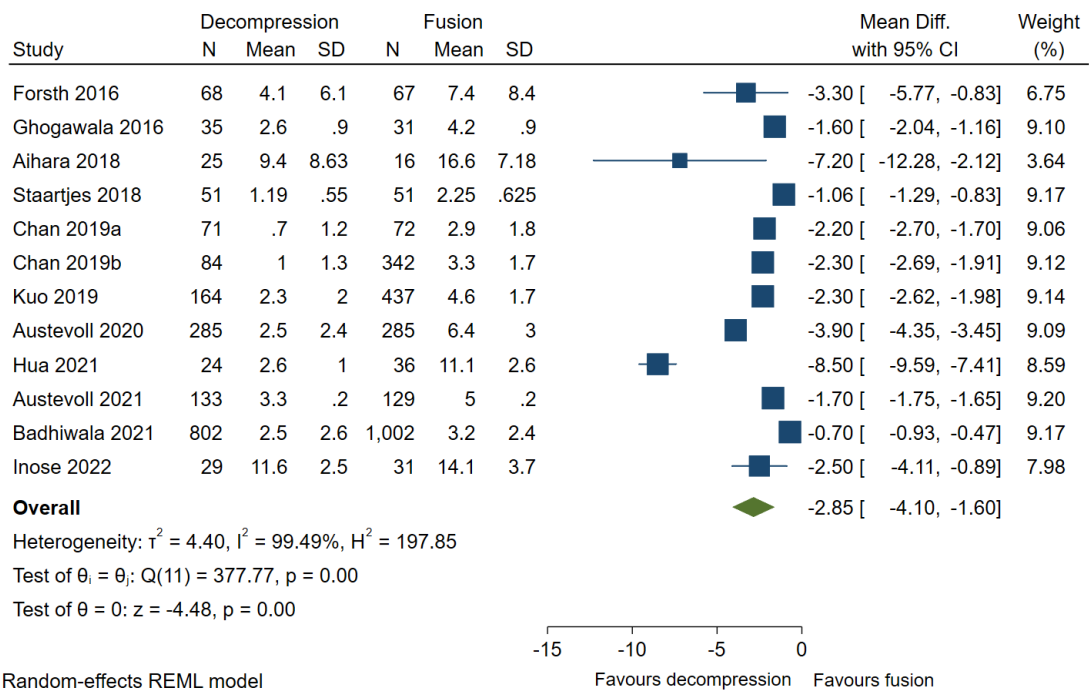



**eFigure 31. Subgroup analysis of length of hospital stay.**

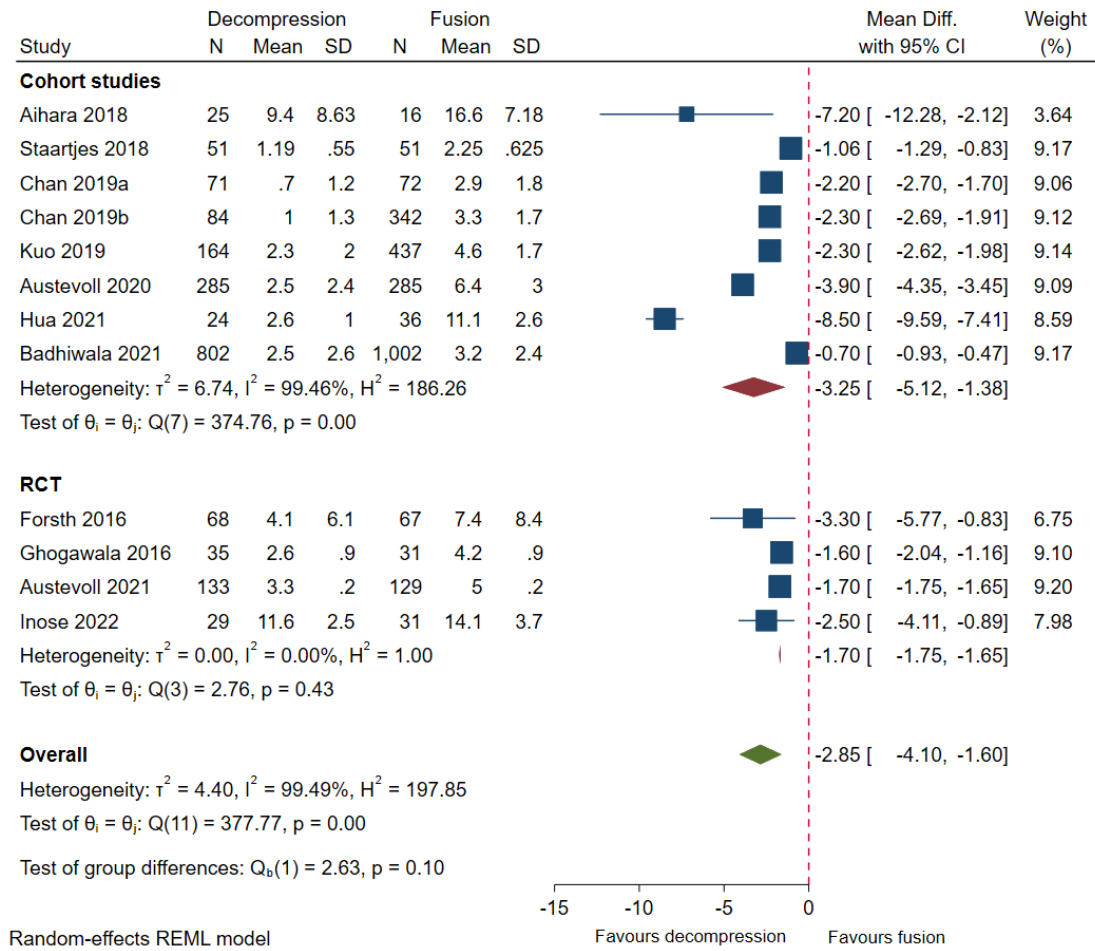

**eTable 1. Search strategy**

| <b>Database</b>             | <b>Strategy</b>                                                                                                                                                                                                                                                           |
|-----------------------------|---------------------------------------------------------------------------------------------------------------------------------------------------------------------------------------------------------------------------------------------------------------------------|
| <b>Pubmed</b>               | #1 "lumbar spondylolisthesis "[MeSH Terms]<br>#2 "decompression"[MeSH Terms] OR "laminectomy"[MeSH Terms] OR "laminotomy"[MeSH Terms] OR " spinal fusion "[All Fields] OR " decompression and fusion"[All Fields] OR "intervertebral fusion"[All Fields]<br>#3 #1 AND #2  |
| <b>Embase</b>               | #1 " lumbar spondylolisthesis "[All Fields]<br>#2 "decompression"[All Fields] OR "laminectomy"[All Fields] OR "laminotomy"[All Fields] OR " spinal fusion "[All Fields] OR "decompression and fusion "[All Fields] OR "intervertebral fusion"[All Fields]<br>#3 #1 AND #2 |
| <b>the Cochrane Library</b> | #1 "lumbar spondylolisthesis"[TI,AB,KW]<br>#2 "decompression"[TI,AB,KW] OR "laminectomy"[TI,AB,KW] OR " laminotomy"[TI,AB,KW] OR "spinal fusion "[TI,AB,KW] OR "decompression and fusion "[TI,AB,KW] OR " intervertebral fusion"[TI,AB,KW]<br>#3 #1 AND #2                |

**eTable 2. Inclusion/exclusion criteria of literature**

| <b>PICOS</b> | <b>Inclusion</b>                                                                                                                                                                          | <b>Exclusion</b>                                                                                                                                                     |
|--------------|-------------------------------------------------------------------------------------------------------------------------------------------------------------------------------------------|----------------------------------------------------------------------------------------------------------------------------------------------------------------------|
| P            | 18 years or older suffering from degenerative lumbar spondylolisthesis.                                                                                                                   | 1) Isthmic spondylolisthesis.<br>2) Patients suffering from trauma, spinal tumors, or infection.                                                                     |
| I            | 1) Decompression alone (including open decompression and minimally invasive decompression).<br>2) Decompression plus fusion.<br>3) Each group had at least 5 patients.                    | Operated with an anterior approach.                                                                                                                                  |
| C            | Decompression alone or decompression plus fusion.                                                                                                                                         | Operated with an anterior approach.                                                                                                                                  |
| O            | 1) Primary outcomes including ODI, pain, clinical satisfaction, complication rates and reoperation rates.<br>2) Secondary outcome included blood loss, operative time, and hospital stay. | Relevant outcomes were missing.                                                                                                                                      |
| S            | RCTs, prospective cohort studies, and retrospective comparative studies in our analysis.                                                                                                  | 1) Non-controlled;<br>2) Studies that were repeatedly published or had qualitative outcomes;<br>3) Quasi-experimental studies, crossover, and observational studies. |

**eTable 3. Risk of bias table.**

|   |                                                           |
|---|-----------------------------------------------------------|
| 1 | Random sequence generation (selection bias)               |
| 2 | Allocation concealment (selection bias)                   |
| 3 | Blinding of participants and personnel (performance bias) |
| 4 | Blinding of outcome assessment (detection bias)           |
| 5 | Incomplete outcome data (attrition bias)                  |
| 6 | Selective reporting (reporting bias)                      |
| 7 | Other bias                                                |

**eTable 4. Characteristics of the Included Trials and Participants.**

| Number | Study          | Country     | Study design | Comparison groups                                                                                                                  | Number of participants | Age, years                       | Gender (Female/Male)         | Grade(s) of DLS | Length of follow-up                              | Primary Outcomes                               | Clinical satisfaction                          | Complication details                                                                                                                                                                                                                                                       |
|--------|----------------|-------------|--------------|------------------------------------------------------------------------------------------------------------------------------------|------------------------|----------------------------------|------------------------------|-----------------|--------------------------------------------------|------------------------------------------------|------------------------------------------------|----------------------------------------------------------------------------------------------------------------------------------------------------------------------------------------------------------------------------------------------------------------------------|
| 1      | Inose 2022     | Japan       | RCT          | 1) decompression alone<br>2) decompression with fusion                                                                             | 1) 28<br>2) 30         | 1) 63.4±8.7<br>2) 63.5±6.8       | 1) 12 /16<br>2) 20 /10       | NA              | 1) 4355.3 (658.4) days<br>2) 4573.5 (883.6) days | VAS, reoperations rate, complication rate      | NA                                             | NA                                                                                                                                                                                                                                                                         |
| 2      | Austevoll 2021 | Norway      | RCT          | 1) decompression alone<br>2) decompression with instrumented fusion                                                                | 1) 133<br>2) 129       | 1) 66.0±7.4<br>2) 66.5±7.9       | 1) 92 /41<br>2) 88 /41       | NA              | 24 months                                        | ODI, NRS, reoperations rate, complication rate | NA                                             | Dural tear, surgery on the wrong side, hematoma, wound infection, cardiovascular complications, venous thromboembolism, urologic complication, respiratory complication, deterioration                                                                                     |
| 3      | Badhiwala 2021 | Canada      | CS           | 1) laminectomy alone<br>2) laminectomy alone with fusion                                                                           | 1) 802<br>2) 1002      | 1) 64.4±11.6<br>2) 62.7±12.1     | 1) 497 /305<br>2) 654 /348   | NA              | 24 months                                        | reoperations rate, complication rate           | NA                                             | Pneumonia, deep vein thrombosis, pulmonary embolism, cardiac event, deep wound infection, stroke, sepsis                                                                                                                                                                   |
| 4      | Hua 2021       | China       | CS           | 1) lumbar endoscopic unilateral laminotomy bilateral decompression<br>2) minimally invasive transforaminal lumbar interbody fusion | 1) 24<br>2) 36         | 1) 59.0±7.9<br>2) 59.9±8.6       | 1) 16 /8<br>2) 26 /10        | I               | 24 months                                        | ODI, VAS, complication rate                    | Four scales: Macnab criteria (24months)        | Dural tears, cauda equina injury, transient urinary retention, pleural effusion, incision fat liquefaction, incision infection, implant dislodgement                                                                                                                       |
| 5      | Joelson 2021   | Sweden      | CS           | 1) decompression alone<br>2) decompression with fusion                                                                             | 1) 597<br>2) 1338      | 1) 69 ± 9.9<br>2) 65±9.1         | 1) 407 /190<br>2) 1027 /311  | NA              | 1) 7.9 (1.8) years<br>2) 7.8 (1.6) years         | Reoperations rate                              | NA                                             | NA                                                                                                                                                                                                                                                                         |
| 6      | Austevoll 2020 | Norway      | CS           | 1) microdecompression alone<br>2) decompression with instrumented fusion                                                           | 1) 285<br>2) 285       | 1) 64.6 ± 9.8<br>2) 64.8 ± 9.2   | 1) 205 /80<br>2) 208 /77     | NA              | 1) 205 (72) months<br>2) 208 (73) months         | ODI, NRS, complication rate                    | NA                                             | Dural tears, nerve root lesion, operation on wrong side/level, blood transfusion, misplaced implants, cardiac complication, superficial wound infection, deep wound infection, deep venous thrombosis, lung thrombosis, pneumonia, urinary tract infection                 |
| 7      | Chan 2019a     | USA         | CS           | 1) minimally invasive decompression<br>2) transforaminal lumbar interbody fusion                                                   | 1) 71<br>2) 72         | 1) 72.3 ± 9.7<br>2) 62.1 ± 10.6  | 1) 39 /32<br>2) 40 /32       | I               | 24 months                                        | ODI, NRS, reoperations rate                    | Four scales: the NASS satisfaction (24 months) | NA                                                                                                                                                                                                                                                                         |
| 8      | Chan 2019b     | USA         | CS           | 1) laminectomy<br>2) minimally invasive transforaminal lumbar interbody fusion                                                     | 1) 84<br>2) 342        | 1) 69.9 ± 10.5<br>2) 60.7 ± 11.0 | 1) 41 /43<br>2) 211 /131     | I               | 12 months                                        | ODI, NRS, reoperations rate                    | NA                                             | NA                                                                                                                                                                                                                                                                         |
| 9      | Pieters 2019   | USA         | CS           | 1) Laminectomy<br>2) decompression with fusion                                                                                     | 1) 907<br>2) 8699      | NA                               | 1) 544 /363<br>2) 5448 /3251 | NA              | 24 months                                        | Reoperations rate, complication rate           | NA                                             | Incisional infection, unplanned intubation, pulmonary embolism, progressive renal insufficiency, stroke, cardiac arrest requiring, myocardial infarction, deep venous thrombosis, sepsis, septic shock, wound disruption, pneumonia, urinary tract infection, transfusions |
| 10     | Kuo 2019       | USA         | CS           | 1) unilateral approach for bilateral decompression<br>2) decompression with fusion                                                 | 1) 164<br>2) 437       | 1) 68.5 ± 9.6<br>2) 69.2 ± 9.6   | 1) 105 /59<br>2) 312 /125    | NA              | 60 months                                        | Reoperations rate, complication rate           | NA                                             | Durotomy, cardiac event, kidney failure, respiratory, surgical site infection, urinary tract infection, venous thromboembolism                                                                                                                                             |
| 11     | Kimura 2019    | Japan       | CS           | 1) microendoscopic muscle-preserving interlaminar decompression<br>2) posterior lumbar interbody fusion                            | 1) 28<br>2) 50         | 1) 70.0 (34-85)<br>2) 26 (46-83) | 1) 17 /11<br>2) 34 /16       | I               | >60 months                                       | VAS, reoperations rate, complication rate      | NA                                             | NA                                                                                                                                                                                                                                                                         |
| 12     | Staatjes 2018  | Switzerland | CS           | 1) decompression alone<br>2) transforaminal lumbar interbody fusion                                                                | 1) 51<br>2) 51         | 1) 52.7 ± 8.4<br>2) 53.5±11.1    | 1) 29 /22<br>2) 26 /25       | I               | 24 months                                        | ODI, NRS, reoperations rate, complication rate | NA                                             | Durotomy, transient paresis, wound infection, spondylodiscitis                                                                                                                                                                                                             |

|    |                  |             |     |                                                                                                                                                                                            |                                      |                                                                   |                                                    |            |                                  |                                                              |                                                                                                                                            |                                                                                                             |
|----|------------------|-------------|-----|--------------------------------------------------------------------------------------------------------------------------------------------------------------------------------------------|--------------------------------------|-------------------------------------------------------------------|----------------------------------------------------|------------|----------------------------------|--------------------------------------------------------------|--------------------------------------------------------------------------------------------------------------------------------------------|-------------------------------------------------------------------------------------------------------------|
| 13 | Aihara 2018      | Japan       | CS  | 1) microendoscopic decompression<br>2) decompression with fusion                                                                                                                           | 1) 25<br>2) 16                       | 1) 62.7 ± 9.74<br>2) 64.3 ± 8.98                                  | 1) 14 /11<br>2) 6 /10                              | NA         | 60 months                        | DOI, reoperations rate, complication rate                    | NA                                                                                                                                         | NA                                                                                                          |
| 14 | Inui 2017        | Japan       | CS  | 1) unilateral approach for bilateral decompression/bilateral approach for contralateral decompression<br>2) decompression+ posterior lumbar interbody fusion                               | 1) 60<br>2) 80                       | 1) 69.3±8.8<br>2) 63.6±8                                          | 1) 35 /25<br>2) 55 /25                             | I, II, III | 1) 38 months<br>2) 77.9 months   | Complication rate, reoperation rate                          | NA                                                                                                                                         | Dural tear, transient motor weakness, deep infection, symptomatic postoperative hematoma                    |
| 15 | Ulrich 2017      | Switzerland | CS  | 1) decompression alone<br>2) decompression with fusion + implantation                                                                                                                      | 1) 85<br>2) 46                       | 1) 75.4±7.6<br>2) 68±7.8                                          | 1) 53 /32<br>2) 23 /23                             | NA         | 12 months                        | NRS, reoperations rate, complication rate                    | NA                                                                                                                                         | Vascular injury, durotomy, wound infection, osseous infection, urosepsis, hemorrhage, wound healing deficit |
| 16 | Vorhies 2017     | America     | CS  | 1) decompression alone<br>2) decompression with fusion                                                                                                                                     | 1) 6712<br>2) 68312                  | 1) 69<br>2) 61                                                    | 1) 3936 /2776<br>2) 42667 /25645                   | NA         | 60 months                        | Reoperations rate                                            | NA                                                                                                                                         | NA                                                                                                          |
| 17 | Ghogawala 2016   | America     | RCT | 1) Laminectomy<br>2) posterolateral fusion + pedicle screw                                                                                                                                 | 1) 35<br>2) 31                       | 1) 66.5 ± 8<br>2) 66.7 ± 7.2                                      | 1) 27 /8<br>2) 26 /5                               | I          | 48 months                        | DOI, complications rate, reoperations rate                   | NA                                                                                                                                         | Wound infection, new neurologic deficit, pneumonia                                                          |
| 18 | Forsth 2016      | Sweden      | RCT | 1) decompression<br>2) decompression with fusion + instrumentation                                                                                                                         | 1) 68<br>2) 67                       | 1) 67±7<br>2) 68±7                                                | 1) 56 /12<br>2) 51 /16                             | NA         | 24 months                        | ODI, VAS, complication rate, reoperation rate                | Three scales: satisfied, doubtful, dissatisfied(24 months)                                                                                 | NA                                                                                                          |
| 19 | Austevoll 2016   | Norway      | CS  | 1) decompression<br>2) decompression with fusion + instrumentation                                                                                                                         | 1) 260<br>2) 260                     | 1) 66.7±10<br>2) 66.3±9.6                                         | 1) 187 /73<br>2) 195 /65                           | NA         | 12 months                        | ODI, NRS, complication rate                                  | Seven scales: completely recovered, much improved, slightly improved, unchanged, slightly worse, much worse and worse than ever(12 months) | Perioperative complications, patient-reported complications                                                 |
| 20 | Alvin 2016       | USA         | CS  | 1) decompression<br>2) posterolateral fusion + instrumentation                                                                                                                             | 1) 25<br>2) 25                       | 1) 57.8±11.9<br>2) 62.7±5.1                                       | 1) 10 /15<br>2) 14 /11                             | I          | 12 months                        | VAS                                                          | NA                                                                                                                                         | NA                                                                                                          |
| 21 | Sigmundsson 2015 | Sweden      | CS  | 1) decompression <sup>1</sup><br>2) posterolateral fusion + instrumentation <sup>1</sup><br>3) decompression <sup>2</sup><br>4) posterolateral fusion + instrumentation <sup>2</sup>       | 1) 125<br>2) 262<br>3) 120<br>4) 332 | 1) 73.8 ± 9.3<br>2) 68.8 ± 8.7<br>3) 73.2 ± 10.6<br>4) 69.1 ± 9.1 | 1) 87 /38<br>2) 202 /60<br>3) 89 /31<br>4) 270 /62 | NA         | 24 months                        | ODI, VAS                                                     | NA                                                                                                                                         | NA                                                                                                          |
| 22 | Sato 2015        | Japan       | CS  | 1) Laminotomy<br>2) posterior lumbar interbody fusion + instrumentation                                                                                                                    | 1) 74<br>2) 89                       | NA<br>NA                                                          | NA<br>NA                                           | I          | 6 months                         | Reoperations rate                                            | NA                                                                                                                                         | NA                                                                                                          |
| 23 | Lattig 2015      | Germany     | CS  | 1) decompression <sup>3</sup><br>2) decompression with fusion+ instrumentation <sup>3</sup><br>3) decompression <sup>4</sup><br>4) decompression with fusion+ instrumentation <sup>4</sup> | 1) 44<br>2) 76<br>3) 19<br>4) 21     | 1) 72.4 ± 9.7<br>2) 67.3 ± 9.3<br>3) 74.3 ± 7.0<br>4) 69.2 ± 7.6  | 1) 29 /15<br>2) 63 /13<br>3) 10 /9<br>4) 17 /4     | NA         | 24 months                        | Core outcome measures index questionnaire                    | NA                                                                                                                                         | NA                                                                                                          |
| 24 | Rampersaud 2014  | Canada      | CS  | 1) unilateral approach for bilateral decompression<br>2) posterior lumbar interbody fusion or posterolateral fusion + pedicle screw                                                        | 1) 46<br>2) 133                      | 1) 67.8 ± 8.6<br>2) 62.5 ± 10.8                                   | 1) 27 /19<br>2) 98 /35                             | I          | 24 months                        | NA                                                           | Substantial clinical benefit(24 months)                                                                                                    | NA                                                                                                          |
| 25 | Forsth 2013      | Sweden      | CS  | 1) decompression<br>2) decompression with fusion                                                                                                                                           | 1) 655<br>2) 651                     | 69                                                                | NA                                                 | NA         | 24 months                        | ODI, VAS, reoperations rate                                  | NA                                                                                                                                         | NA                                                                                                          |
| 26 | Park 2012        | Korea       | CS  | 1) unilateral approach for bilateral decompression<br>2) posterior lumbar interbody fusion + instrumentation                                                                               | 1) 20<br>2) 25                       | 1) 67.7±7.3<br>2) 61.9±8.0                                        | 1) 15 /5<br>2) 22 /3                               | I          | 1) 54.9 months<br>2) 69.4 months | ODI, NRS                                                     | Odom's criteria: excellent, good, fair, poor (Last Follow-up)                                                                              | Incidental durotomy, wound infection                                                                        |
| 27 | Kleinstueck 2012 | Switzerland | CS  | 1) decompression<br>2) decompression with fusion+                                                                                                                                          | 1) 56<br>2) 157                      | 1) 73.0±8.0<br>2) 67.4±9.4                                        | 1) 33 /23<br>2) 122 /35                            | NA         | 12 months                        | Core outcome measures index questionnaire, complication rate | Two scales: good and poor(12 months)                                                                                                       | bleeding in/outside spinal canal, dura lesion, wound infection,                                             |

|    |                 |        |     |                                                                                                                                    |                        |                               |                        |    |                                              |                                          |                                                                                                      |                                                                                                       |
|----|-----------------|--------|-----|------------------------------------------------------------------------------------------------------------------------------------|------------------------|-------------------------------|------------------------|----|----------------------------------------------|------------------------------------------|------------------------------------------------------------------------------------------------------|-------------------------------------------------------------------------------------------------------|
|    |                 |        |     | instrumentation                                                                                                                    |                        |                               |                        |    |                                              |                                          |                                                                                                      | continuing pain, wound dehiscence<br>necrotic wound                                                   |
| 28 | Kim 2012        | Canada | CS  | 1) unilateral approach for bilateral decompression<br>2) decompression and instrumented fusion with or without an interbody fusion | 1) 57<br>2) 58         | 1) 67.1±9.7<br>2) 63.7±9.7    | 1) 25 /32<br>2) 42 /16 | I  | 120 months                                   | Reoperation rate                         | Four scales: well, unwell<br>no improvement and<br>death (120 months)                                | NA                                                                                                    |
| 29 | Matsudaira 2005 | Japan  | CS  | 1) decompression<br>2) posterolateral fusion + pedicle screw                                                                       | 1) 18<br>2) 19         | 1) 67±7<br>2) 68±7            | NA                     | I  | 24 months                                    | Complication rate, reoperation rate      | Four scales: satisfied,<br>slightly satisfied, slightly<br>dissatisfied, dissatisfied<br>(24 months) | Deep infection, migration of a<br>pedicle screw, stenosis at an<br>adjacent level                     |
| 30 | Ghogawala 2004  | USA    | CS  | 1) laminectomy<br>2) laminectomy or laminotomy +<br>posterolateral fusion                                                          | 1) 20<br>2) 14         | 68.8±8.0                      | 23 /11                 | I  | 12 months                                    | ODI, complication rate, reoperation rate | NA                                                                                                   | Pneumonia, major wound infection,<br>preexisting radiculopathy,<br>cerebrospinal fluid leaks          |
| 31 | Yone 1996       | Japan  | CS  | 1) laminotomy<br>2) laminectomy or laminotomy +<br>posterolateral fusion                                                           | 1) 7<br>2) 10          | 1) 69<br>2) 68                | NA                     | NA | ≥ 24 months                                  | Complication rate                        | Four scales: according to<br>the rate of improvement<br>(≥ 24 months)                                | Compression fracture, nonunion,<br>dislocation of a Knodt hook                                        |
| 32 | Bridwell 1993   | USA    | RCT | 1) decompression<br>2) posterolateral fusion<br>3) posterolateral fusion + pedicle screw                                           | 1) 9<br>2) 10<br>3) 24 | 1) 72.3<br>2) 65.6<br>3) 64.2 | 33 /10                 | NA | 1) 34 months<br>2) 45 months<br>3) 36 months | Complication rate, reoperation rate      | Worse, the same,<br>significantly better (≥ 24<br>months)                                            | Cerebrovascular accident,<br>superficial wound infection, dural<br>tear, poor lateral screw placement |
| 33 | Herkowitz 1991  | USA    | RCT | 1) Laminectomy<br>2) posterolateral fusion                                                                                         | 1) 25<br>2) 25         | 1) 65±5.0<br>2) 63.5±5.2      | 36 /14                 | NA | 36 months                                    | NA                                       | NA                                                                                                   | NA                                                                                                    |

DLS: degenerative lumbar spondylolisthesis; CS: cohort studies; RCT: randomized controlled trial; DLS: degenerative lumbar spondylolisthesis; ODI: Oswestry disability index; VAS: visual analogue scores; NRS: numerical rating scale.

<sup>1</sup> Back pain<Leg pain; <sup>2</sup> Back pain>Leg pain

**eTable 5.** Scores of the Newcastle-Ottawa Quality Assessment Scale for 27 cohort studies.

| Study            | Selection | Comparability | Outcome | Total   |
|------------------|-----------|---------------|---------|---------|
| Yone 1996        | ★★★       | ★             | ★★★     | ★★★★★★★ |
| Ghogawala 2004   | ★★★★      | ★★            | ★★★     | ★★★★★★★ |
| Matsudaira 2005  | ★★★       | ★             | ★★★     | ★★★★★★★ |
| Kim 2012         | ★★★★      | ★             | ★★      | ★★★★★★★ |
| Kleinstueck 2012 | ★★★★      | -             | ★★★     | ★★★★★★★ |
| Park 2012        | ★★★★      | ★             | ★★★     | ★★★★★★★ |
| Forsth 2013      | ★★★★      | ★             | ★★★     | ★★★★★★★ |
| Rampersaud 2014  | ★★★★      | -             | ★★★     | ★★★★★★★ |
| Lattig 2015      | ★★★★      | ★             | ★★★     | ★★★★★★★ |
| Sato 2015        | ★★★       | ★             | ★★★     | ★★★★★★★ |
| Sigmundsson 2015 | ★★★★      | ★★            | ★★★     | ★★★★★★★ |
| Alvin 2016       | ★★★★      | ★             | ★★      | ★★★★★★★ |
| Austevoll 2016   | ★★★★      | ★★            | ★★★     | ★★★★★★★ |
| Vorhies 2017     | ★★★★      | ★             | ★★      | ★★★★★★★ |
| Ulrich 2017      | ★★★★      | ★             | ★★★     | ★★★★★★★ |
| Inui 2017        | ★★★       | ★             | ★★★     | ★★★★★★★ |
| Aihara 2018      | ★★★★      | ★             | ★★★     | ★★★★★★★ |
| Staartjes 2018   | ★★        | ★             | ★★★     | ★★★★★★  |
| Kimura 2019      | ★★★★      | ★★            | ★★      | ★★★★★★★ |
| Kuo 2019         | ★★★★      | ★★            | ★★★     | ★★★★★★★ |
| Pieters 2019     | ★★★★      | ★             | ★★★     | ★★★★★★★ |
| Chan 2019        | ★★★★      | -             | ★★      | ★★★★★★  |
| Chan 2019        | ★★★★      | -             | ★★      | ★★★★★★  |
| Austevoll 2020   | ★★★★      | ★★            | ★★★     | ★★★★★★★ |
| Joelson 2021     | ★★★★      | -             | ★★★     | ★★★★★★★ |
| Hua 2021         | ★★★★      | ★★            | ★★★     | ★★★★★★★ |
| Badhiwala 2021   | ★★★★      | ★             | ★★★     | ★★★★★★★ |
